1 **A novel prokaryotic CRISPR-Cas12a based tool for programmable transcriptional**  
2 **activation and repression**

3 Christoph Schilling<sup>1</sup>, Mattheos Koffas<sup>2,3</sup>, Volker Sieber<sup>1,4,5,6</sup> and Jochen Schmid<sup>1,7</sup>

4

- 5 1) Chair of Chemistry of Biogenic Resources, Technical University of Munich,  
6 Campus for Biotechnology and Sustainability, Schulgasse 16, 94315,  
7 Straubing, Germany  
8 2) Center for Biotechnology and Interdisciplinary Studies, Rensselaer  
9 Polytechnic Institute, Troy, New York 12180, United States  
10 3) Department of Chemical and Biological Engineering, Rensselaer  
11 Polytechnic Institute, Troy, New York 12180, United States  
12 4) Fraunhofer IGB, Straubing Branch BioCat, Schulgasse 23, 94315,  
13 Straubing, Germany  
14 5) TUM Catalysis Research Center, Ernst-Otto-Fischer-Straße1, 85748,  
15 Garching, Germany  
16 6) The University of Queensland, School of Chemistry and Molecular  
17 Biosciences, 68 Copper Road, St. Lucia, 4072, Australia  
18 7) Institute for Molecular Microbiology and Biotechnology, Westfälische  
19 Wilhelms-Universität Münster, Corrensstrasse 3, 48149 Münster, Germany

20 Corresponding author: [jochen.schmid@uni-muenster.de](mailto:jochen.schmid@uni-muenster.de)

21 Keywords: *Paenibacillus polymyxa*. CRISPRa, CRISPRi, Cas12a, Multiplex gene  
22 regulation

23

24 Abbreviations: CRISPR: clustered regularly interspaced short palindromic repeats;  
25 CRISPRi: CRISPR interference; CRISPRa: CRISPR activation; gRNA: guide RNA;  
26 GTi: initiating glycosyltransferase; 2,3-BDL: 2,3-butanediol; EPS:  
27 exopolysaccharide

28

## 29 **Abstract**

30 Transcriptional perturbation using inactivated CRISPR-nucleases (dCas) is a common  
31 method in eukaryotic organisms. While rare examples of dCas9 based tools for  
32 prokaryotes have been described, multiplexing approaches are limited due to the used  
33 effector nuclease. For the first time, a dCas12a derived broad host range tool for the  
34 targeted activation and repression of genes was developed. Therefore, a previously  
35 described SoxS activator domain was linked to dCas12a to enable programmable  
36 activation of gene expression. Proof of principle of transcriptional regulation was  
37 demonstrated based on fluorescence reporter assays using the alternative host  
38 organism *Paenibacillus polymyxa* as well as *Escherichia coli*. Single target and  
39 multiplex CRISPR interference targeting the exopolysaccharide biosynthesis of *P.*  
40 *polymyxa* was shown to emulate polymer compositions of gene knock-outs.  
41 Simultaneous expression of 11 gRNAs targeting multiple lactate dehydrogenases and  
42 a butanediol dehydrogenase resulted in decreased lactate formation, as well as an  
43 increased butanediol production in microaerobic fermentation processes. Even though  
44 Cas12a is more restricted in terms of its genomic target sequences compared to Cas9,  
45 its ability to efficiently process its own guide RNAs *in vivo* makes it a promising tool to  
46 orchestrate sophisticated genetic reprogramming of bacterial cells or to screen for  
47 engineering targets in the genome. The developed tool will accelerate metabolic  
48 engineering efforts in common synthetic bacterial cell factories such as *E. coli*, as well  
49 as promising alternative host organisms.

## 50 **1. Introduction**

51 Seeking a biobased and sustainable economy, bacterial cell factories have been used  
52 for the production of a variety of high value products such as amino acids<sup>1</sup>, biofuels<sup>2</sup>  
53 or biosynthesis of complex pharmaceutical compounds like artemisinic acid<sup>3</sup>. The

54 development of robust production strains for industrial scale production typically  
55 requires a deep understanding of the underlying metabolic networks enabling  
56 sophisticated engineering technologies to optimize fluxes towards the product of  
57 interest and eliminating unwanted side products<sup>4</sup>. Within the last decade, the  
58 development of new technologies such as CRISPR-Cas9 mediated genome editing  
59 resulted in a dramatic increase in the complexity and scope of metabolic engineering  
60 approaches<sup>5-8</sup>.

61 Catalytically inactive variants of CRISPR-nucleases (dCas), which still bind specific  
62 DNA sequences via programmable guide RNAs (gRNA) but do not cause a double  
63 strand break, have been applied to physically block gene expression in a multitude of  
64 CRISPR interference (CRISPRi) approaches in bacteria<sup>9-11</sup> modulating the expression  
65 of genes of interest. In eukaryotic organisms, CRISPRi has been further expanded by  
66 direct fusion of Cas9 and effector domains to remodel the chromatin structure of target  
67 genes resulting in an even tighter control of expression<sup>12-14</sup>. Contrary, CRISPR-  
68 mediated activation (CRISPRa) of gene expression was achieved by linking the  
69 deactivated CRISPR-nuclease from *Streptococcus pyogenes* dCas9 to transcriptional  
70 activation domains via translational fusion or recruitment domains on the target  
71 gRNA<sup>15,16</sup>. While CRISPRa has been extensively used and further developed for  
72 eukaryotic organisms to activate transcription of target genes<sup>17</sup>, the number of  
73 synthetic tools for prokaryotes is still limited. Recently, new CRISPR-Cas9 based  
74 systems were developed for bacteria using effector domains such as RpoZ<sup>9</sup>, RpoA<sup>18,19</sup>,  
75 bacteriophage derived transcriptional activators like AsiA<sup>20,21</sup> or the more effective  
76 AraC family transcription factor SoxS<sup>22</sup> that facilitate the recruitment of the RNA  
77 polymerase holoenzyme. In order to overcome narrow target site requirements, more  
78 flexible CRISPRa toolkits using  $\sigma^{54}$ -dependent promoters were established<sup>23</sup>. Thereby,

79 CRISPR-dCas guided bacterial enhancer binding proteins were directed to upstream  
80 activating sequences in order to enable long distance regulation of target promoters.  
81 Similar to eukaryotic systems, a remarkable dynamic output range was achieved<sup>23</sup>.

82 While Cas9 derived from *Streptococcus pyogenes* is the most well-studied RNA-  
83 guided endonuclease and was used in a multitude of studies, it has demonstrated  
84 several downsides in simultaneously targeting multiple loci. Although, multiplex  
85 genome editing can be realized, a uniform expression of multiple gRNAs proved to be  
86 challenging. Strategies to overcome this constraint include the expression of sgRNA  
87 transcripts from multiple plasmids, the co-expression of RNA processing enzymes  
88 such as RNase III<sup>24</sup> and Csy4<sup>25,26</sup> or flanking of consecutive gRNAs by ribozymes or  
89 tRNAs that enable efficient processing of the mature gRNA<sup>27,28</sup> from a single transcript.  
90 However, all these strategies are limited in the number of multiplex targets due to  
91 cytotoxic effects. Contrary, multiplex genome editing approaches using Cas12a  
92 nuclease orthologs (also known as Cpf1) from *Francisella novicida*, *Acidaminococcus*  
93 sp. or *Lachnospiraceae* sp. require only the expression of a single crRNA array<sup>29,30</sup>.  
94 Opposed to Cas9, these minimalistic class 2 type V-A CRISPR-Cas systems do not  
95 contain the HNH nuclease domain. Instead, the staggered double strand cleavage of  
96 the target DNA is mediated by a single RuvC domain upon binding of the  
97 ribonucleoprotein complex to its target site<sup>31,32</sup>. Interestingly, unlike Cas9, Cas12a  
98 additionally possesses RNase activities to process the precursor crRNA array and form  
99 the gRNAs necessary to direct the CRISPR nuclease to the target DNA<sup>30</sup>. Leveraging  
100 this dual RNase/DNase function, simultaneous perturbation of 25 individual targets  
101 was demonstrated in mammalian cell lines using a single transcript harboring both the  
102 open reading frame of Cas12a and a CRISPR array<sup>33</sup>. The protospacer adjacent motif  
103 (PAM), required for CRISPR-nucleases to bind and cleave its target DNA, of Cas12a

104 nucleases differs from Cas9. Contrary to Cas9, the PAM is located upstream of the  
105 cleavage site and consists of a sequence with a very low GC content. For all commonly  
106 used Cas12a nucleases from *Francisella novicida*, *Acidaminococcus* sp. or  
107 *Lachnospiraceae* sp. the most efficient PAM was determined as TTTV<sup>34,35</sup>. While this  
108 particular PAM is more restrictive compared to NGG of *SpCas9*, protein engineering  
109 efforts to loosen the stringency of CRISPR nucleases to enable genome editing in  
110 otherwise inaccessible loci were successful<sup>36,37</sup>.

111 Due to its advantages for multiplex genome perturbation studies, dCas12a has been  
112 extensively used for the tunable transcriptional regulation of gene expression via  
113 CRISPRi and CRISPRa in eukaryotic cells<sup>29,33,37</sup>. Despite rapid advances in CRISPR-  
114 based technologies, to the best of our knowledge, only CRISPR interference studies  
115 have previously been reported for prokaryotic cells using dCas12a<sup>38</sup>, while publications  
116 demonstrating the targeted gene activation via CRISPRa are still missing for this  
117 promising CRISPR system. Therefore, the aim of this study was to establish a  
118 functional dCas12a based multiplex gene modulation system capable of CRISPRa and  
119 CRISPRi using a broad-host range plasmid.

120 *Paenibacillus polymyxa* is a Gram-positive, spore forming, non-pathogenic, soil  
121 bacterium<sup>39</sup> of biotechnological interest for its ability to produce enantiopure *R,R*-2,3-  
122 butanediol (2,3-BDL) and exopolysaccharides (EPS) with interesting material  
123 properties<sup>40,41</sup>. *P. polymyxa* DSM 365 putatively produces two distinct  
124 heteroexopolysaccharides we termed Paenan I and Paenan II, which is reflected in  
125 two functionally complete EPS clusters encoding all genes required for the Wzx/Wzy  
126 biosynthesis pathway<sup>42,43</sup>. Knock-outs of distinct glycosyltransferases within the  
127 clusters resulted in EPS variants with altered rheological behavior<sup>42</sup>. While more  
128 laborious and time consuming knock-outs can be conducted, CRISPRi-based knock-

129 downs might be used to enable the fast screening of new EPS variants with interesting  
130 material properties. *P. polymyxa* is also applied in the production of 2,3-BDL via the  
131 mixed-acid fermentation pathway in microaerobic conditions. Depending on oxygen  
132 availability, production of side products such as lactate, formate and ethanol is required  
133 to maintain the redox balance<sup>44</sup>. We recently showed that metabolic engineering of the  
134 side pathways competing for pyruvate was able to increase productivity of 2,3-BDL  
135 biosynthesis<sup>45</sup>. However, despite the knock-out of one specific lactate dehydrogenase,  
136 lactate as a by-product was still produced due to the action of redundant homologs. In  
137 this study, lactate should be eliminated by the concerted knock-down of all four  
138 different lactate dehydrogenases found in the genome. Additionally, the carbon flux  
139 should be directed towards 2,3-BDL by inducing the expression of the butanediol  
140 dehydrogenase in parallel via a newly developed CRISPRa/i system.

## 141 **2. Materials and Methods**

### 142 **2.1 Strains and media**

143 *P. polymyxa* DSM 365 was acquired from the German Collection of Microorganisms  
144 and Cell Culture (DSMZ), Braunschweig, Germany. *E. coli* NEB Turbo cells (New  
145 England Biolabs, USA) were used for any plasmid construction presented in this study.  
146 *E. coli* S17-1 (DSMZ strain DSM 9079) was utilized for transformation of *P. polymyxa*  
147 DSM 365 via conjugation. All medium components were obtained from Carl Roth  
148 GmbH (Germany) if not indicated differently. For cloning procedures, strains were  
149 grown in LB media (5 g L<sup>-1</sup> yeast extract, 10 g L<sup>-1</sup> tryptone, 10 g L<sup>-1</sup> NaCl) and  
150 additionally supplemented with 50 µg mL<sup>-1</sup> neomycin and 20 µg mL<sup>-1</sup> polymyxin if  
151 required. All strains were stored in 30 % glycerol at -80 °C. Prior to cultivation, strains  
152 were streaked on LB agar plates and grown at 30 °C. All strains used or constructed  
153 in this study are listed in Table S1.

154 For 2,3-BDL fermentations a single colony was used for inoculation of 50 mL pre-  
155 culture medium containing 60 g L<sup>-1</sup> glucose, 5 g L<sup>-1</sup> yeast extract, 5 g L<sup>-1</sup> tryptone, 0.2  
156 g L<sup>-1</sup> MgSO<sub>4</sub> heptahydrate (Sigma Aldrich, USA), 3.5 g L<sup>-1</sup> KH<sub>2</sub>PO<sub>4</sub>, 2.5 g L<sup>-1</sup> K<sub>2</sub>HPO<sub>4</sub>.  
157 Fermentation medium components were autoclaved separately and contained 120 g  
158 L<sup>-1</sup> glucose, 5 g L<sup>-1</sup> yeast extract, 3.5 g L<sup>-1</sup> tryptone, 0.2 g L<sup>-1</sup> MgSO<sub>4</sub>·7 H<sub>2</sub>O, 3.5 g L<sup>-1</sup>  
159 KH<sub>2</sub>PO<sub>4</sub>, 2.5 g L<sup>-1</sup> K<sub>2</sub>HPO<sub>4</sub>, 5 g L<sup>-1</sup> ammonium acetate, 4 g L<sup>-1</sup> (NH<sub>4</sub>)<sub>2</sub>SO<sub>4</sub> and 3 mL L<sup>-1</sup>  
160 <sup>1</sup> trace element solution. Trace element solution contained 2.5 g L<sup>-1</sup> iron sulfate  
161 heptahydrate, 2.1 g L<sup>-1</sup> sodium tartrate dihydrate, 1.8 g L<sup>-1</sup> manganese chloride  
162 dihydrate, 0.075 g L<sup>-1</sup> cobalt chloride hexahydrate, 0.031 g L<sup>-1</sup> copper sulfate  
163 pentahydrate, 0.258 g L<sup>-1</sup> boric acid, 0.023 g L<sup>-1</sup> sodium molybdate dihydrate and  
164 0.021 g L<sup>-1</sup> zinc chloride. Trace element solution was filter-sterilized and added to the  
165 media after cooling down to room temperature.

166 For EPS production, MM1 P100 medium<sup>40</sup> was used as described before, containing  
167 30 g L<sup>-1</sup> glucose and 5 g L<sup>-1</sup> peptone. The corresponding pre-culture medium contained  
168 a reduced amount of 10 g L<sup>-1</sup> glucose and was buffered to pH 6.8 with 20 g L<sup>-1</sup> MOPS.

## 169 **2.2 Plasmid construction**

170 The gene encoding for an engineered (E174R, N282A, S542R, K548R)<sup>37</sup> catalytically  
171 inactivate (D908A) variant of AsCas12a was codon optimized for *Bacillus* ssp. and  
172 synthesized by ATG:biosynthetics (Germany). The basic plasmid pCRai (Figure S1)  
173 was assembled by isothermal Gibson Assembly<sup>46</sup> from three PCR-amplified fragments  
174 consisting of a pUB110 derived backbone including oriT for conjugational transfer<sup>42</sup>, a  
175 lacZ replacement cassette for BbsI based cloning of target gRNAs and the codon  
176 optimized *enAsdcas12a* cassette. Activator domains were PCR-amplified from  
177 extracted gDNA of *P. polymyxa* DSM 365 and *E. coli* NEB Turbo respectively and  
178 cloned into pCRai by Golden Gate Assembly using BsaI. Cloning of gRNA sequences

179 was conducted as previously described<sup>42</sup>. The PsgsE-sfGFP reporter was cloned via  
180 isothermal Gibson Assembly using a unique SpeI site of pCRai. The dual reporter  
181 plasmid was constructed by cloning a PsgsE-mRFP and a PsgsE-sfGFP reporter  
182 cassette in tandem by Golden Gate Assembly after linearization of pCRai\_soxS with  
183 SpeI/Sall. All oligonucleotides used for the construction of plasmids are listed in Table  
184 S2 and S3.

### 185 **2.3 Conjugation based transformation of *P. polymyxa* DSM 365**

186 *P. polymyxa* was transformed by conjugation using *E. coli* S17-1 harboring the various  
187 plasmids. Overnight cultures of donor and recipient strains were diluted 1:100 with  
188 selective or non-selective LB media respectively and cultivated at 37 °C for 3 h, 280  
189 rpm. 900 µL of the recipient culture was heat shocked at 42 °C for 15 min and mixed  
190 with 300 µl of the donor strain culture. Cells were centrifuged at 6,000 g for 2 min,  
191 resuspended in 800 µl LB media and dropped on non-selective LB agar plates. After  
192 24 h of incubation at 30 °C, cells were scrapped off, resuspended in 500 µl LB-broth  
193 and 100 µl thereof plated on selective LB-agar containing 50 µg mL<sup>-1</sup> neomycin and 20  
194 µg mL<sup>-1</sup> polymyxin for counter selection. *P. polymyxa* conjugants were analyzed for  
195 successful transformation after 48 h incubation at 30 °C by cPCR. Confirmed knock  
196 out strains were plasmid cured by cultivation in LB broth without antibiotic selection  
197 pressure and subsequent replica plating on LB agar plates both with and without  
198 neomycin. Strains that did not grow on plates with selection marker were verified by  
199 sequencing of the target region and used for further experiments.

200

### 201 **2.4 Photometric assay**

202 For sfGFP fluorescence experiments, 3 mL of EPS medium supplemented with 50 µg  
203 mL<sup>-1</sup> neomycin was inoculated with a single colony of the respective strains and grown



204 over night at 37 °C, 200 rpm. After 18 h, each strain was sub-cultured 1:100 in 3 mL  
205 selective MM1 P100 medium and grown for 24 h at 37 °C, 200 rpm. After 24 h, 100 µl  
206 were transferred to a 96 well microtiter plate and OD<sub>600</sub>, GFP fluorescence (Ex. 488  
207 nm Em. 515 nm) and mRFP fluorescence (Ex. 560 nm Em. 600 nm) measured in a  
208 Ultraspec 10 spectrophotometer (Amersham Biosciences, UK). In parallel, 1 mL of  
209 each culture was pelleted by centrifugation and used for qPCR experiments.

## 210 **2.5 Quantitative RT-PCR**

211 RNA extraction of positive samples of the GFP fluorescence assay as well as  
212 butanediol fermentation processes was performed using the Aurum Total RNA Mini Kit  
213 (BioRad, USA) according to the manufacturer's instructions. Synthesis of cDNA was  
214 conducted using iScript reverse transcriptase (BioRad, USA) using 1 µg total RNA  
215 template. The qPCR reactions were performed in triplicates on a CFX-96 thermocycler  
216 using SsoAdvanced Universal SYBR Green Supermix (BioRad, USA) using 5 ng of  
217 cDNA as a template in 10 µl reaction volume. Negative controls without reverse  
218 transcriptase during cDNA synthesis were used in order to evaluate the absence of  
219 gDNA contaminations. Relative gene expression levels were calculated based on the  
220  $\Delta\Delta Cq$  method<sup>47</sup> and *gyrA* as a reference gene. After qPCR, a melting curve analysis  
221 was performed to confirm the presence of a single PCR product for each target.  
222 Designed primers were analyzed by the OligoAnalyzer Tool (IDT, USA) to avoid hairpin  
223 formation, self- and hetero dimer formation with free energy values more than 10 kcal  
224 mol<sup>-1</sup>. Oligonucleotides used for qPCR experiments are listed in Table S2.

## 225 **2.6 CRISPR-Cas9 mediated genome editing**

226 All gene knock-outs were performed as previously described by Rütering et al.<sup>42</sup>. In  
227 brief, gRNAs for the targeted genome regions were designed using Benchling CRISPR  
228 Design Tool. For each target a minimum of two gRNAs were designed typically

229 targeting distinct regions of the open reading frame. Oligonucleotides were  
230 phosphorylated, annealed and cloned into pCasPP by Golden Gate assembly.  
231 Approximately 1 kB up- and downstream homology flanks for each targeted nucleotide  
232 sequence were amplified from genomic DNA of *P. polymyxa* DSM 365 using Phusion  
233 Polymerase according to the manufacturer's instructions and fused by overlap  
234 extension PCR via a 20 bp overlap. Homology flanks were cloned into pCasPP through  
235 Gibson Assembly or molecular cloning after linearization by use of *Spe*I. After  
236 transformation of *E. coli* NEB Turbo, clones were analyzed for correct construct  
237 assembly by colony PCR (cPCR) and sequencing of the amplicons. Finally, correct  
238 constructs were transferred to chemical competent *E. coli* S17-1 cells for the following  
239 conjugational transformation of *P. polymyxa*.

## 240 **2.7 EPS batch fermentation**

241 EPS fermentations were conducted in a 1 L DASGIP parallel bioreactor system with a  
242 working volume of 500 mL. A single colony from a freshly streaked plate was used to  
243 inoculate 100 mL MM1 P100 pre-culture medium by following incubation for 16 h at 30  
244 °C, 160 rpm. Bioreactors were inoculated to give an initial OD of 0.1. Fermentation was  
245 performed at 30°C and stirrer speed (200 - 600 rpm) and gassing (6 - 10 L h<sup>-1</sup>) with  
246 pressurized air through a L-sparger were controlled to maintain 30 % DO saturation.  
247 The stirrer was equipped with a 6-plate-rushton impeller placed 2.5 cm from the bottom  
248 of the shaft. The pH value was maintained at 6.8 and automatically adjusted with 2 M  
249 NaOH or 1.35 M H<sub>3</sub>PO<sub>4</sub> as required. Foam control was performed using 1 % of  
250 antifoam B (Merck, Germany). For monitoring the process parameters, reactors were  
251 equipped with redox and dissolved oxygen probes.

252 After the end of the process the fermentation broth was diluted 1:10 with dH<sub>2</sub>O and the  
253 biomass was separated by centrifugation (15 000 g, 20°C, 20 min) followed by cross-

254 flow filtration of the supernatant using a 100 kDa filtration cassette (Hydrosart,  
255 Sartorius AG, Germany). EPS was precipitated by slowly pouring the concentrated  
256 fermentation supernatant into two volumes of isopropanol. EPS was collected and  
257 dried overnight in a VDL53 vacuum oven at 40°C (Binder, Germany). Dry weight of the  
258 obtained EPS was determined gravimetrically prior to milling to a fine powder in a ball  
259 mill at 30 Hz for 1 min (Mixer Mill MM400, Retsch GmbH, Germany).

## 260 **2.8 Carbohydrate fingerprinting**

261 EPS monosaccharide composition was analysed using the 1-phenyl-3-methyl-5-  
262 pyrazolone high-throughput method (HT-PMP) as previously described using 1 g L<sup>-1</sup>  
263 reconstituted EPS solutions<sup>48</sup>. In brief, 0.1 % EPS solutions were hydrolyzed in a 96  
264 well plate, sealed with a rubber mat and further covered by a custom-made metal  
265 device with 2 M TFA (90 min, 121°C). Samples were neutralized with 3.2 % NH<sub>4</sub>OH.  
266 75 µl of PMP master mix (125 mg PMP, 7 mL MeOH, 3,06 mL dH<sub>2</sub>O, 437.5 µL 3.2%  
267 NH<sub>4</sub>OH) were mixed with 25 µl of neutralized hydrolysate and incubated at 70°C for  
268 100 min in a PCR cycler. 20 µl of derivatized samples were mixed with 130 µl of a 1:26  
269 dilution of 0.5 M acetic acid and filtered with a 0.2 µm filter plate (1,000 g, 2 min)  
270 followed by HPLC-UV-MS analysis as previously described<sup>48</sup>.

## 271 **2.9 Butanediol batch fermentation**

272 Batch fermentations were conducted in 1 L DASGIP bioreactors (Eppendorf, Germany)  
273 with an initial volume of 550 mL. A single colony from a freshly streaked plate was used  
274 to inoculate 100 mL pre-culture medium by following incubation for 16 h at 30 °C, 160  
275 rpm. 50 mL of this cultivation broth (diluted with pre-culture medium if required) were  
276 used to inoculate the bioreactor by an initial OD<sub>600</sub> of 0.1. Fermentation was performed  
277 at 35 °C and constant aeration of 0.075 vvm. The stirrer was equipped with a 6-plate-  
278 rushton impeller placed 4 cm from the bottom of the shaft and constantly stirring at 300

279 rpm. The pH value was maintained at 6.0 and automatically adjusted with the addition  
280 of 2 M NaOH or 1.35 M H<sub>3</sub>PO<sub>4</sub> as required. Foam control was performed using 1 % of  
281 antifoam B (Merck, Germany). In order to monitor process parameters, reactors were  
282 equipped with redox and pH probes. Glucose and product concentrations were  
283 determined via a HPLC-UV-RID system (Dionex, USA) equipped with Rezex ROA-H<sup>+</sup>  
284 organic acid column (300 mm x 7.8 mm Phenomenex, USA). Column temperature was  
285 set to 70 °C and 2.5 mM H<sub>2</sub>SO<sub>4</sub> was used as the mobile phase with a flow rate of 0.5  
286 ml min<sup>-1</sup>. All measured concentrations of 2,3-BDL in this publication represent solely  
287 the levo-stereoisomer of the alcohol if not explicitly noted differently.

288

### 289 **3. Results and Discussion**

#### 290 **3.1 Identification of functional transcriptional activator domains**

291 In a first step, different transcription activator domains of distinct regulatory protein  
292 families were tested in order to identify a suitable candidate for CRISPRa. Each domain  
293 was linked by translational fusion to the C-terminal end of dCas12a through a 10 amino  
294 acid flexible linker peptide (-GSEASGSGRA-). As endogenous transcription activators  
295 from *P. polymyxa*, the cAMP receptor protein (CRP) RNA polymerase subunits  $\sigma^{70}$   
296 (RpoD) and  $\omega$  (RpoZ), as well as the regulator of the glutamate synthase operon (GltC)  
297 were evaluated. SoxS, an activator of the superoxide stress genes from *E. coli* was  
298 chosen as an additional heterologous regulator. Out of these, only RpoZ and SoxS  
299 have previously been reported as suitable candidates using dCas9 based CRISPRa  
300 systems<sup>9,22</sup>. The plasmid pCRai\_sfGFP was constructed by isothermal assembly  
301 based on the previously established Cas9 genome editing plasmid pCasPP<sup>42</sup>.  
302 pCRai\_sfGFP encodes dCas12a linked to the different transcriptional activators, the

303 corresponding gRNA expression cassette, as well as *sfgfp* under the control of  
304 constitutive promoters.

305 The *sgsE*-promoter from *Geobacillus stearothermophilus* used for sfGFP expression  
306 is a temperature sensitive promoter containing three core promoter sites<sup>49</sup>. At low  
307 temperatures of 28 °C the front most core promoter (P3) is active, resulting in a weak  
308 basal expression, while elevated temperatures of 37 - 45°C lead to highly increased  
309 expression from RNA-polymerase binding sites further upstream (P1 and P2) as  
310 shown in *B. subtilis*<sup>49</sup>. Therefore, this promoter was chosen to test CRISPRa activities  
311 of the different activator domains in order to induce strong expression levels even at  
312 low temperature (Figure 1 A). Eukaryotic CRISPRa systems allow a relatively broad  
313 range, in which gRNAs mediate the binding of the CRISPR effector module to  
314 efficiently activate or repress the expression of target genes. Contrarily, bacterial  
315 CRISPRa systems have demonstrated to be highly sensitive to the correct distance of  
316 the gRNA binding site to the promoter<sup>22</sup>. Bacterial CRISPRa systems act by facilitating  
317 the recruitment of the RNA-polymerase to the promoter, while eukaryotic systems  
318 typically cause chromatin re-arrangements to interfere with the expression of target  
319 genes<sup>13</sup>. For bacterial dCas9 based systems, an optimal distance was determined in  
320 the range between 60 to 100 bp upstream of the transcriptional start site (TSS)<sup>22</sup>. The  
321 optimal distance might vary depending on different activator domains. Consequently,  
322 we tested four different gRNAs binding to the template and non-template strand in the  
323 range of 40 to 120 bp upstream of the TSS to induce expression from the strong RNA-  
324 polymerase binding site P3 (Figure 1). In order to test whether observed effects  
325 actually arise from the binding of the dCas12a-activator complex to the respective  
326 target sites, additional constructs with off-target gRNAs expression were constructed.

327 Out of all tested gRNA-activator constructs, *EcSoxS* demonstrated the best  
328 performance in *P. polymyxa* (Figure 1 B). Three out of four tested gRNAs significantly  
329 increased expression of sfGFP and showed an increased fluorescence signal during  
330 photometric evaluation. The qPCR experiments showed up to 6.5-fold increased  
331 transcription levels for gRNA\_a4, but also gRNA\_a1 and gRNA\_a3 displayed  
332 increased transcription and fluorescence signals (Figure 1 C). Surprisingly, the highest  
333 fluorescence signal was achieved using gRNA\_a4, which was positioned 50 bp  
334 upstream of the TSS of the heat-inducible promoter site P1 (Figure 1 A). While the  
335 close proximity of the binding site of this gRNA lies outside of the ideal distance  
336 determined for a dCas9-soxS construct<sup>22</sup>, the distance to the second RNA-polymerase  
337 binding site (P2) of 85 bp might result in transcription from the secondary heat-inducible  
338 promoter.

339 Additionally, dCas12a fused to other activator domains such as RpoD, GltC and CRP  
340 respectively also demonstrated increased fluorescence results for individual gRNAs  
341 (Figure 1 B). However, some combinations also led to a decreased fluorescence signal  
342 of GFP in *P. polymyxa* indicating that the effector module blocks the binding of the  
343 RNA-polymerase to the promoter and therefore effectively represses transcription of  
344 the gene of interest. For GltC and CRP, the use of gRNAs a3 and a4, which are located  
345 in close proximity to each other (10 bp), effects on GFP expression changed from 2-  
346 fold increased GFP signal to transcriptional repression. All of the investigated  
347 activators act by direct interaction with the RNA-polymerase<sup>50-52</sup>. Contrary to other  
348 activators, there is experimental evidence suggesting that SoxS already forms a binary  
349 pre-recruitment complex with the C-terminal domain of the  $\alpha$ -subunit and scans DNA  
350 for cognate SoxS binding sites<sup>53,54</sup>. Therefore, we hypothesize that a similar pre-  
351 recruitment is formed with the dCas12a-SoxS fusion protein, which allows more

352 flexibility in the correct distancing of the gRNA to the promoter binding site. Due to the  
353 consistent performance of the dCas12a-soxS constructs, this particular activator  
354 domain was used for all further experiments.

**A**

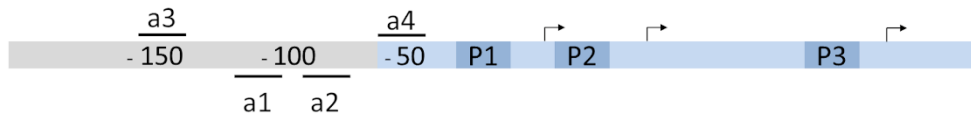

**B**

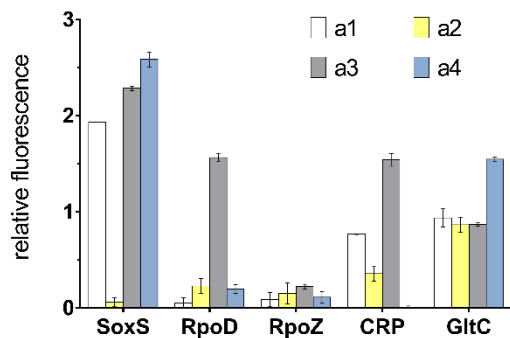

**C**

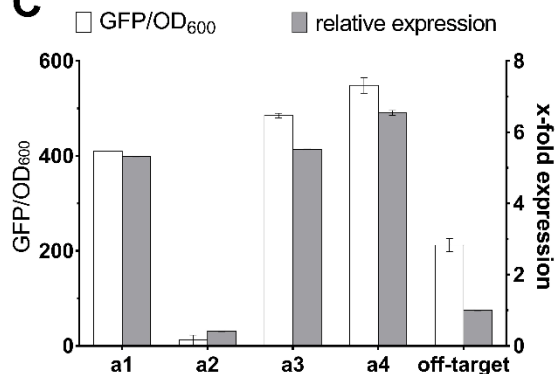

355

356 **Figure 1: Establishment of a CRISPRa system using dCas12a linked to activator**  
357 **domains** A) Schematic overview of CRISPRa target sites upstream of the *sgsE*  
358 promoter (blue). dCas12a was fused to different activator domains (SoxS, RpoD,  
359 RpoZ, CRP, GltC) and positioned upstream of the *sgsE*-promoter with multiple gRNAs  
360 targeting template and non-template strand (a1 - a4). The promoter consists of three  
361 core promoter binding sites (P1 - P3), of which the heat-inducible P1 site corresponds  
362 to the strongest expression<sup>49</sup>. CRISPRa experiments aim to activate expression from  
363 P1 already at low temperatures. Arrows indicate the TSS of the corresponding core  
364 promoter sites. B) GFP expression using different activator domains and gRNAs (a1 -  
365 a4) relative to a corresponding off-target gRNA. SoxS showed up to 2.5-fold GFP  
366 fluorescence with three gRNAs, while RpoD, CRP and GltC demonstrated elevated  
367 fluorescence for only one gRNA respectively. C) Expression levels determined by  
368 qPCR (relative expression) showed up to 6.5-fold increased transcription levels of *gfp*  
369 for soxS variants compared to off-target gRNAs.

370 Interestingly, while all experiments using the fluorescence reporter system were  
371 performed in *P. polymyxa*, observed effects were almost identical in *E. coli* S17-1 that  
372 was used for the conjugational transformation of *P. polymyxa* DSM 365 (Figure S 2).  
373 Consequently, we demonstrated a broad-host range use of the constructed  
374 pCRai\_soxS plasmid in both Gram-positive, as well as Gram-negative bacteria. In case  
375 of the fluorescence reporter assays, in which all functional parts were encoded on a  
376 single plasmid, it was possible to accelerate the screening of potential guide RNAs by  
377 using *E. coli* S17-1 as a pre-screening platform prior to the more time-consuming  
378 conjugational transformation of *P. polymyxa* DSM 365.

379 Our results exemplified that the stringency of gRNA positioning with the SoxS domain  
380 is lower compared to other activators. Empirical testing of multiple gRNAs is still  
381 required to enable improved activation of target promoters. However, it might be  
382 possible to establish a design rule set to enable *a priori* construction of optimized  
383 gRNAs with more experimental data using different promoters.

### 384 **3.2 Establishment of CRISPRi and multiplexing CRISPRi/a**

385 In a next step, we evaluated whether the use of the dCas12a-soxS activator constructs  
386 is also possible for CRISPRi by re-positioning the gRNA within the open reading frame  
387 of sfGFP. Thereby, the effector module acts as a road block for the RNA-polymerase  
388 and inhibits the elongation of the nascent transcript. Three different gRNAs binding  
389 sites were tested (Figure 2 A). While expression levels of *sfgfp* were significantly  
390 decreased by approximately 80 % for all constructs, the actual fluorescence of GFP  
391 remained at higher levels for gRNAs T1 and T2 (Figure 2 A B). Even though,  
392 fluorescence signals were not fully eliminated, a severe decrease of up to 95 % for  
393 gRNA T3 was observed.



A

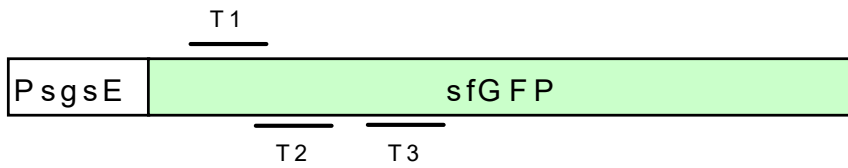

B

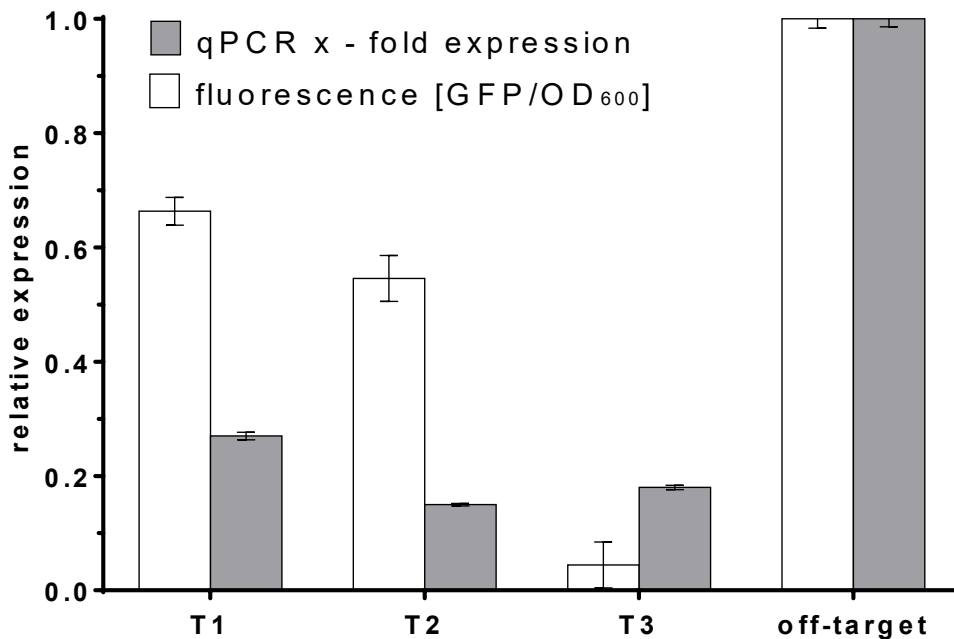

394

395 **Figure 2: Establishment of CRISPRi in *P. polymyxa* using pCRai\_soxS.** A)  
396 Schematic overview of gRNA binding sites within the ORF of sfGFP. B) Three gRNAs  
397 targeting the ORF of *sfgfp* (T1-T3) were tested respectively by fluorescence  
398 experiments and qPCR expression analysis relative to an off-target gRNA. While  
399 transcriptional expression levels were reduced by 75 % to 80 % for all gRNAs,  
400 measured fluorescence levels of GFP fluctuated more between different gRNAs. The  
401 gRNA T3 demonstrated the best repression resulting in a highly reduced fluorescence  
402 signal as well as a reduced transcription of *sfgfp*. Reporter expression was determined  
403 photometrically and by qPCR experiments in biological triplicates.

404

405 In order to test the capability of our construct to simultaneously repress and activate  
406 different target genes, a continuously expressed mRFP reporter cassette was cloned  
407 in pCRai\_soxS in addition to the sfGFP reporter. For CRISPRa, the previously used  
408 gRNA\_a1 was chosen to induce the expression of sfGFP. For CRISPRi a new gRNA  
409 was designed binding within the ORF of *mrfp* (Figure 3 A). All strains of *P. polymyxa*  
410 were compared to a strain harboring an off-target CRISPR-array. Due to weak  
411 fluorescence signals after 24 h of inoculation, only transcriptional expression levels  
412 were determined via qPCR at this point of time, but photometric evaluation of the  
413 reporters was performed after 48 h. When expressed individually, CRISPRi resulted in  
414 a reduction of the mRFP fluorescence signal by 74 %, while CRISPRa increased  
415 sfGFP expression by 68 % (Figure 3 B). Simultaneous expression of both gRNAs from  
416 a single CRISPR-array decreased mRFP fluorescence by 60 %, while increasing the  
417 fluorescence signal of sfGFP by 120 %. Therefore, we demonstrated the efficient  
418 control of the expression of multiple genes using a single CRISPR-array. Depending  
419 on the positioning of the gRNAs, it proved possible to activate or repress multiple  
420 target genes in parallel.

A

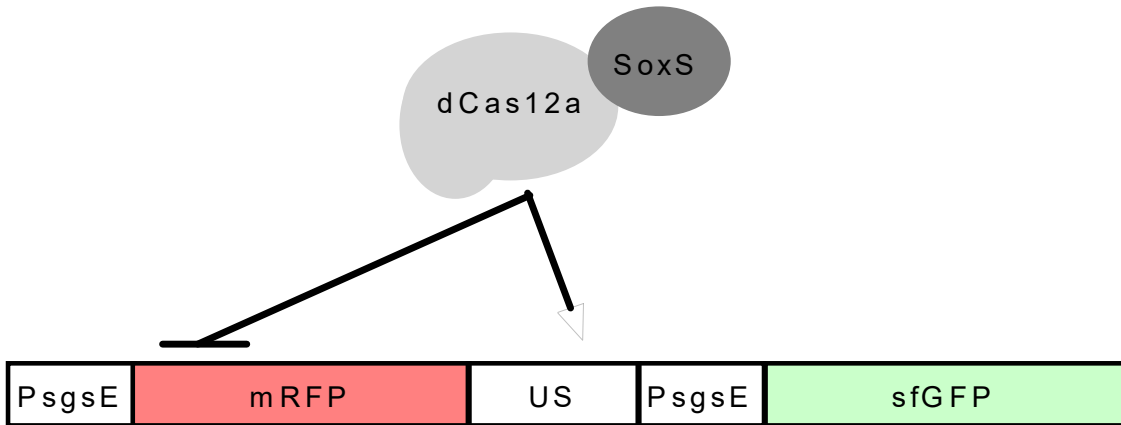

B

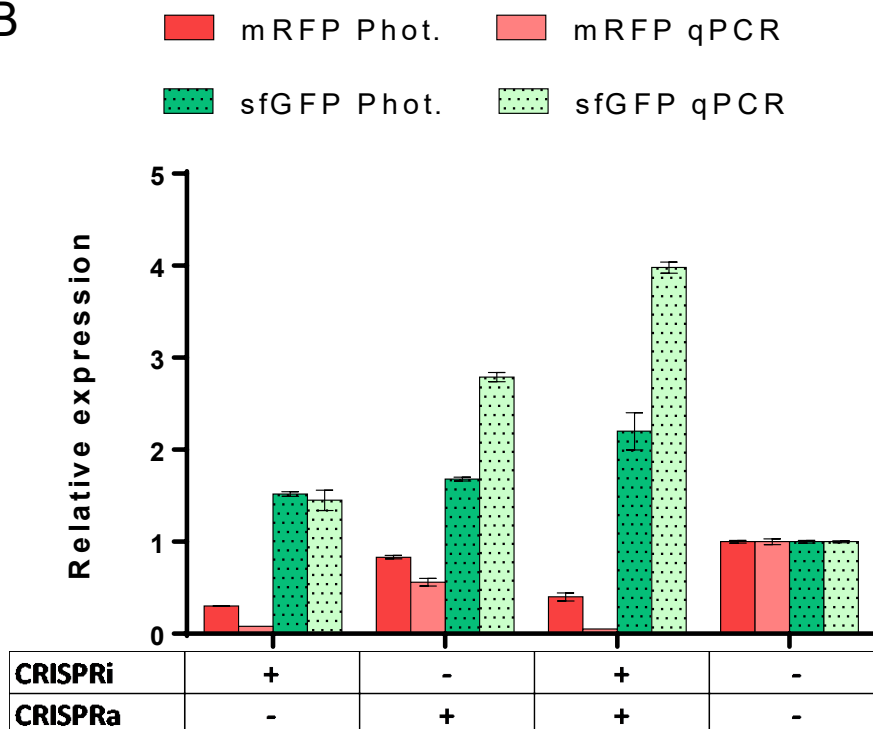

421

422 **Figure 3: Simultaneous repression (CRISPRi, mRFP) and activation (CRISPRa,**  
 423 **sfGFP) of fluorescence reporters.** A) Schematic display of gRNA binding sites within  
 424 the ORF of mRFP and in the upstream region (US) of PsgsE controlling the expression

425 of sfGFP. B) Multiplex transcriptional perturbation was tested in *P. polymyxa* harboring  
426 a plasmid for the constitutive expression of GFP and mRFP fluorescence reporters.  
427 Single CRISPR arrays were designed targeting the ORF of mRFP or the upstream  
428 region of PsgsE controlling *sfgfp* expression (gRNA\_a1). Expression of gRNAs  
429 resulted in the repression of mRFP or induction of sfGFP respectively. When both  
430 gRNAs were expressed simultaneously, obtained fluorescence results were similar to  
431 the expression of individual gRNAs alone. All results are depicted relative to an off-  
432 target CRISPR array encoding a gRNA not present in the strain. Reporter expression  
433 was determined photometrically and by qPCR experiments in biological triplicates.

434

### 435 **3.3 Multiplex CRISPRi to modify exopolysaccharide composition of *P. polymyxa***

#### 436 **DSM 365**

437 The most important advantage of Cas12a over the more commonly used Cas9 is the  
438 ability of the effector nuclease to process its own crRNA, allowing the simultaneous  
439 targeting of multiple loci through a single CRISPR-array<sup>33</sup>.

440 *P. polymyxa* DSM 365 is an avid producer of different exopolysaccharides. Depending  
441 on process conditions, variable polymer-mixtures are produced<sup>40</sup>. However, it has also  
442 been shown that the engineering of a polysaccharide structure with modified  
443 physicochemical properties is feasible<sup>42</sup>. The underlying gene cluster contains the two  
444 so-called initiating glycosyltransferases (GTi) PepC and PepQ, which are putatively  
445 responsible for the initiation of the biosynthesis of two distinct polysaccharides (Figure  
446 4 A). Contrary to the first polymer (Paenan I), the second polymer (Paenan II) initiated  
447 by PepQ contains the deoxyhexose fucose (unpublished data). To evaluate the effects  
448 of CRISPRi constructs on genomic targets, the GTi PepQ was targeted alone or in  
449 combination with PepC. Strains harboring the plasmids pCRaiS (pCRai\_soxS  
450 encoding an off-target spacer), pCRaiS\_pepQ (targeting the ORF of *pepQ*) and  
451 pCRaiS\_pepCQ (targeting the ORFs of *pepC* and *pepQ*) were constructed and used

452 in EPS batch fermentations. Carbohydrate fingerprints of the obtained EPS were  
453 performed and compared to the respective knock-out strains (Figure 4 B).

454 Strains harboring the pCRaiS plasmid expressing an off-target CRISPR-array did not  
455 show altered EPS composition. When the second GTi *pepQ* was targeted, fucose  
456 diminished, indicating the absence of Paenan II in the EPS mixture. In a next step,  
457 both initiating GTs were targeted simultaneously. With both GTis down-regulated, no  
458 EPS at all was produced. In order to evaluate whether the observed effects actually  
459 resulted from interference with the respective target genes, knock-out strains of the  
460 respective target genes with a previously established CRISPR-Cas9 genome editing  
461 system<sup>42</sup> were constructed. Our experiments confirmed that the monomer composition  
462 was comparable to the respective CRISPRi variants (Figure 4 B). In the previous  
463 fluorescence reporter assays, reduced signal of mRFP and GFP respectively could still  
464 be detected in CRISPRi approaches. Contrary, for the glycosyltransferase targets, no  
465 significant differences in EPS composition were observed between the CRISPRi  
466 constructs and the knock-out strains, indicating a more efficient repression of the target  
467 genes in comparison to the fluorescence assays.

468

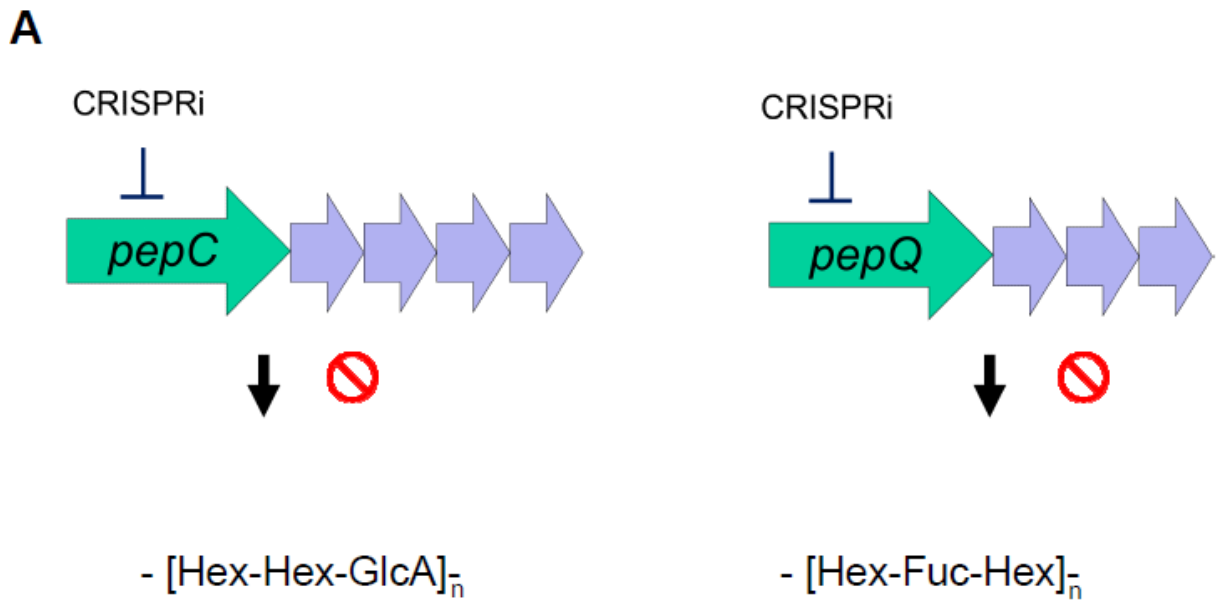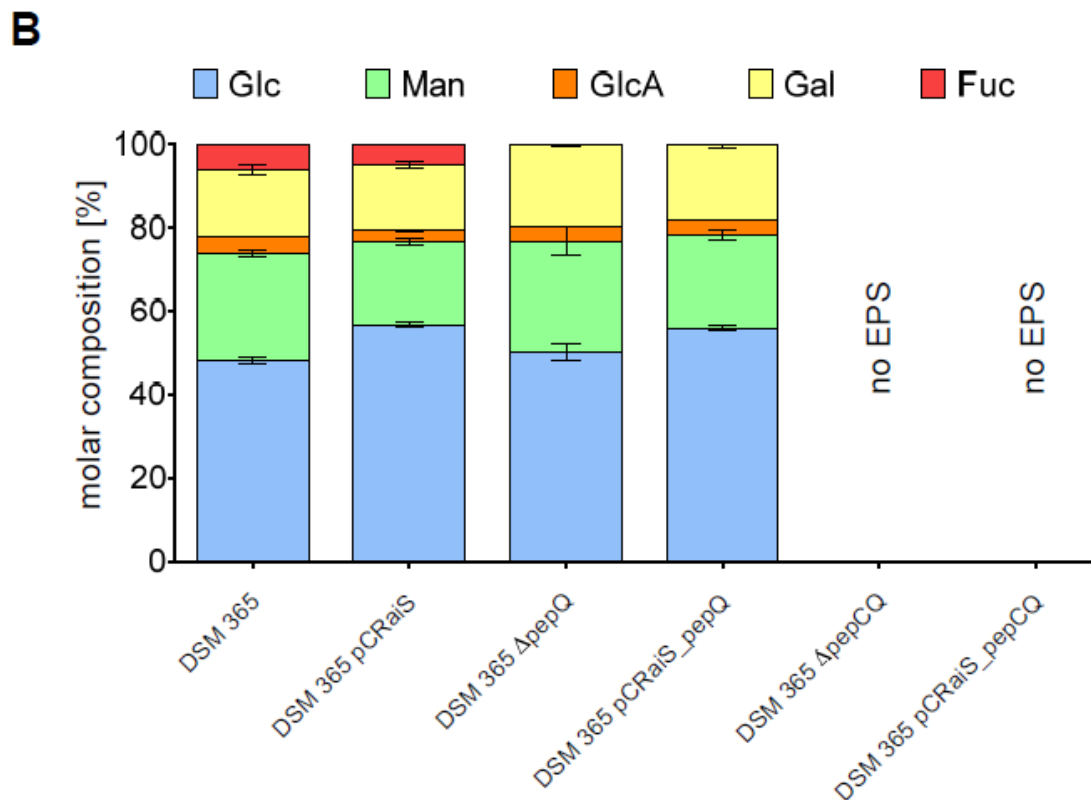

469

470 **Figure 4: Carbohydrate fingerprint of the heteroexopolysaccharide of *P.***  
471 ***polymyxa* DSM 365 and engineered variants.** Transformation of *P. polymyxa* with a  
472 plasmid encoding the SoxS activator domain and off-target gRNA (pCRaiS) did not  
473 alter the EPS composition significantly. Expression of a gRNA targeting the ORF of the  
474 initiating glycosyltransferase *pepQ* (pCRaiS\_pepQ) resulted in the loss of fucose within

475 the EPS composition that was also observed in the KO strain  $\Delta pepQ$ . Targeting the  
476 ORFs of both GTis (pCRaiS\_pegCQ) did not yield any EPS resembling the same  
477 phenotype as the double KO  $\Delta pepCQ$ ,  $\Delta$ : gene deletion by CRISPR-Cas9 mediated  
478 genome engineering. DSM 365: *P. polymyxa* DSM 365; pCRaiS: pCRai\_soxS; Hex:  
479 hexose; GlcA: glucuronic acid; Fuc: fucose; Glc: glucose; Man: mannose; Gal:  
480 galactose

481 In conclusion, this approach showed that the developed pCRai\_soxS tool can be used  
482 for the parallel screening for multiple interesting knock-out targets in the genome. In  
483 addition, the efficiency of this tool proved to be comparable to more laborious and time-  
484 consuming genome-editing approaches.

### 485 **3.4 Multiplex CRISPRi/a to screen for metabolic engineering targets of the** 486 **butanediol biosynthesis pathway in *P. polymyxa* DSM 365**

487 In a previous study we engineered the mixed acid pathway of *P. polymyxa* DSM 365  
488 to increase the production of 2,3-BDL and remove undesirable side-products.  
489 Interestingly, knock-out of a lactate dehydrogenase (*ldh1*) resulted in an adapted  
490 growth behavior, increased biomass formation and consequently enhanced 2,3-BDL  
491 formation<sup>45</sup>. However, due to the presence of additional homologs of *ldh* within the  
492 genome, lactate formation could not be completely eliminated. Therefore, in order to  
493 demonstrate the capabilities of our dCas12a-based CRISPR-tool, all additional copies  
494 of *ldh* homologs were targeted in parallel. Leveraging the CRISPR-array processing  
495 abilities of Cas12a, each gene was targeted with two gRNAs at the same time. As  
496 decoupling of the 2,3-BDL biosynthesis from its natural regulon showed positive  
497 effects, the expression of the butanediol dehydrogenase should also be  
498 transcriptionally activated in *P. polymyxa* DSM 365  $\Delta ldh1$ . Therefore, the  
499 corresponding promoter was predicted using the Softberry CNNPromoter\_b tool<sup>55</sup>.  
500 Three distinct gRNAs positioned 106 - 180 bp upstream of the putative TSS were

501 tested separately (*bdh\_a1* – *a3*). Thereby, three strains carrying plasmid constructs,  
 502 each targeting 11 genomic sites in parallel were designed and evaluated in batch  
 503 fermentations using microaerobic conditions (Figure 5 A).

504

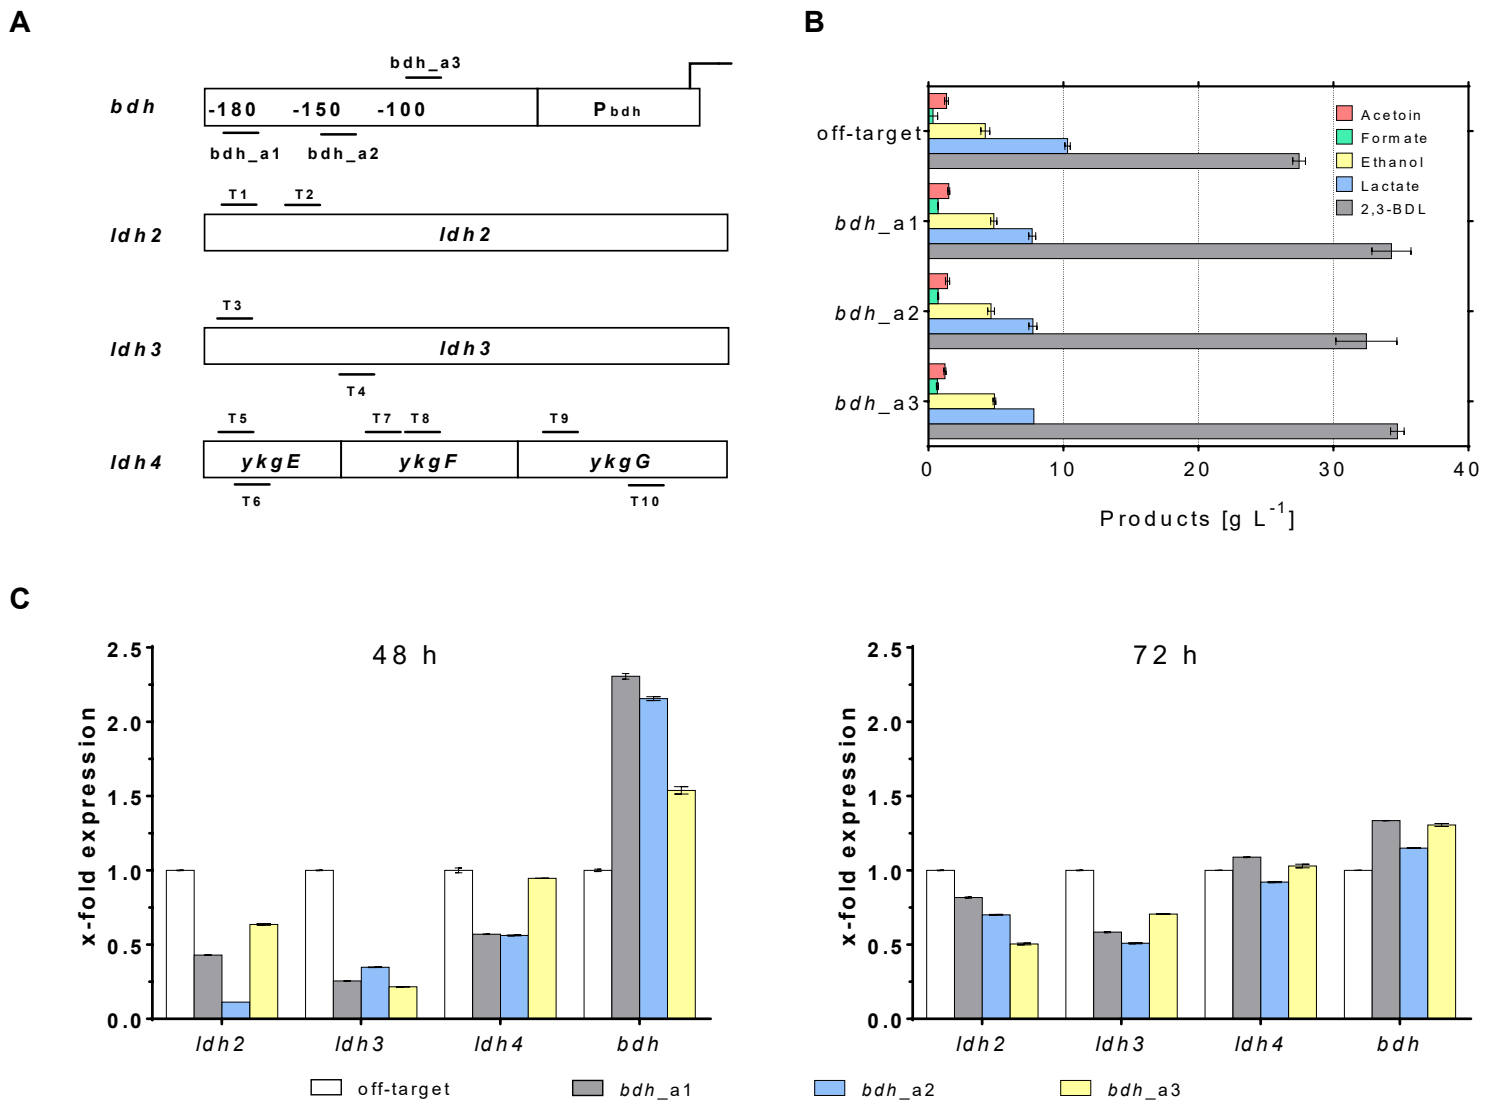

505

506 **Figure 5: Multiplex CRISPRi and CRISPRa to engineer the mixed acid pathway of**  
 507 ***P. polymyxa* and increase 2,3-BDL production.** A) Schematic overview of gRNA  
 508 binding sites. Three different gRNAs binding upstream of the  $P_{bdh}$  promoter were tested  
 509 individually (*bdh\_a1*-3). Simultaneously, all constructs also targeted three putative  
 510 lactate dehydrogenase genes with a total of nine gRNAs (T1-T9) to knock-down the  
 511 respective genes. B) Product titer obtained after 72 h cultivation at microaerobic



512 conditions. Compared to an off-target construct, lactate production was reduced by  
513 ~20 % in strains expressing target gRNAs. 2,3-BDL production was increased and  
514 reached a maximum of 34.7 g L<sup>-1</sup> in the construct using *bdh\_a3* to target *bdh*  
515 expression. Depicted values represent the mean of biological duplicates. C)  
516 Expression of target genes was analyzed via qPCR after 48 h and 72 h of cultivation.  
517 After 48 h, transcription levels of lactate dehydrogenases (*ldh2* - 4) were significantly  
518 reduced compared to a strain expressing off-target gRNAs. Furthermore, also  
519 expression of a butanediol dehydrogenase was increased. However, after 72 h of  
520 cultivation, effects of CRISPRi and CRISPRa were severely reduced.

521

522 2,3-BDL fermentations were conducted for 72 h. Despite the fact that each ORF  
523 encoding the different lactate dehydrogenases was targeted with two gRNAs, lactate  
524 production in all strains was reduced only by ~20 % compared to the strain harboring  
525 the off-target gRNA (Figure 5 B). However, 2,3-BDL titers were increased from 27.5 g  
526 L<sup>-1</sup> to 34.7 g L<sup>-1</sup> for the *P. polymyxa* expressing gRNA *bdh\_a3*, corresponding to a 26 %  
527 increased product titer. Additionally, also the strains encoding *bdh\_a1* and *bdh\_a2*  
528 showed 25 % and 18 % increased 2,3-BDL titers respectively. All other end products  
529 of the mixed acid pathway that were not targeted by any gRNA remained similar in all  
530 variants (Figure 5, Figure S 3). Furthermore, 2,3-BDL yields were increased by  
531 approximately 20 % for all strains encoding target gRNAs, indicating a redirection of  
532 the carbon flux from lactate to 2,3-BDL (Table S4).

533 While the general principle of our developed CRISPRi/a tool could be successfully  
534 demonstrated, effects of both transcriptional repression and activation were not as  
535 pronounced as observed in the fluorescence and EPS experiments. Expression  
536 analysis via qPCR revealed transcriptional perturbation of all *ldh* homologs ranging  
537 from 50 % to 80 % after 48 h of cultivation (Figure 5 C). Furthermore, two gRNAs  
538 binding 106 bp and 146 bp respectively upstream of the TSS of the *bdh* promoter

539 caused more than a 2-fold increased expression on the transcriptional level. However,  
540 after 72 h effects on the transcriptional perturbation were significantly decreased. We  
541 hypothesize that the observed decreased effects by our dCas12a tool are a combined  
542 result of a rather low expression of the CRISPR-tool at microaerobic conditions and  
543 long cultivation times used for 2,3-BDL fermentations. Due to the restrictive PAM site  
544 of Cas12a of *Acidaminococcus* sp., optimal distancing from the TSS might not always  
545 be possible and impede genome wide screenings. However, engineered variants of  
546 Cas12a have shown expanded binding motifs and enabled the targeting of otherwise  
547 inaccessible PAMs<sup>37</sup>.

#### 548 **4. Conclusion**

549 While CRISPRi has been continuously demonstrated in bacteria, CRISPRa technology  
550 is lacking behind on their eukaryotic counterparts. Currently available systems are still  
551 limited in their number of targets that can be modified in parallel due to the use of  
552 dCas9. In this study, we showed the first successful utilization of dCas12a for the  
553 simultaneous activation and repression of multiple genes in the alternative host  
554 organism *P. polymyxa* DSM 365.

555 While gRNAs particularly for CRISPRa still need to be optimized individually for each  
556 target promoter, utilization of SoxS as an activator domain enables more flexibility in  
557 the correct distancing to the target promoter compared to other tested activator  
558 domains. In this study, we demonstrated an efficient broad host range tool for the  
559 parallel transcriptional modulation of expression patterns in bacteria that can be  
560 applied for both metabolic engineering efforts and screening of potential targets for  
561 further studies. With ongoing studies using dCas12a-SoxS based tools for CRISPRa  
562 in bacterial hosts it will be possible to establish more precise design rule sets for the

563 efficient positioning of the effector module for CRISPRi and CRISPRa to facilitate and  
564 accelerate the use of dCas12a based transcriptional perturbation tools.

565 Even though Cas12a is more restricted in terms of its PAM sequence compared to  
566 Cas9, its ability to efficiently process its own gRNAs makes it a promising tool to  
567 orchestrate sophisticated genetic reprogramming of bacterial cells or to screen for  
568 engineering targets in the genome.

569 In conclusion, this work demonstrated both, the simultaneous activation and repression  
570 of multiple targets in the genome of *P. polymyxa* using a single CRISPR array and  
571 represents therefore an important extension of current Cas9-based tools. We  
572 demonstrated that the developed tool is functional in common bacterial cell factories  
573 such as *E. coli* as well as in the Gram-positive alternative host organism *P. polymyxa*.  
574 Usage of multiplex transcriptional perturbation will facilitate genome wide screenings  
575 of potential engineering targets and thereby accelerate metabolic engineering efforts.

## 576 **5. Acknowledgement**

577 This work was supported by the German Federal Ministry of Education and Research  
578 (BMBF) in frame of the project MaPolKo (number 03VP02560). MAGK would like to  
579 acknowledge funding from the U.S. National Science Foundation, award MCB-  
580 1817631.

581

## 582 References

- 583 (1) Wendisch, V. F.; Bott, M.; Eikmanns, B. J. Metabolic Engineering of *Escherichia*  
584 *coli* and *Corynebacterium Glutamicum* for Biotechnological Production of  
585 Organic Acids and Amino Acids. *Curr. Opin. Microbiol.* **2006**, *9* (3), 268–274.  
586 <https://doi.org/10.1016/j.mib.2006.03.001>.
- 587 (2) Jin, Y.-S.; Cate, J. H. Metabolic Engineering of Yeast for Lignocellulosic Biofuel  
588 Production. *Curr. Opin. Chem. Biol.* **2017**, *41*, 99–106.  
589 <https://doi.org/10.1016/j.cbpa.2017.10.025>.
- 590 (3) Ro, D.-K.; Paradise, E. M.; Ouellet, M.; Fisher, K. J.; Newman, K. L.; Ndungu, J.  
591 M.; Ho, K. A.; Eachus, R. A.; Ham, T. S.; Kirby, J.; Chang, M. C. Y.; Withers, S.  
592 T.; Shiba, Y.; Sarpong, R.; Keasling, J. D. Production of the Antimalarial Drug  
593 Precursor Artemisinic Acid in Engineered Yeast. *Nature* **2006**, *440* (7086), 940–  
594 943. <https://doi.org/10.1038/nature04640>.
- 595 (4) Nielsen, J.; Keasling, J. D. Engineering Cellular Metabolism. *Cell* **2016**, *164* (6),  
596 1185–1197. <https://doi.org/10.1016/j.cell.2016.02.004>.
- 597 (5) Jiang, W.; Bikard, D.; Cox, D.; Zhang, F.; Marraffini, L. A. RNA-Guided Editing of  
598 Bacterial Genomes Using CRISPR-Cas Systems. *Nat. Biotechnol.* **2013**, *31*,  
599 233.
- 600 (6) Jakočiūnas, T.; Bonde, I.; Herrgård, M.; Harrison, S. J.; Kristensen, M.;  
601 Pedersen, L. E.; Jensen, M. K.; Keasling, J. D. Multiplex Metabolic Pathway  
602 Engineering Using CRISPR/Cas9 in *Saccharomyces cerevisiae*. *Metab. Eng.*  
603 **2015**, *28*, 213–222. <https://doi.org/10.1016/j.ymben.2015.01.008>.
- 604 (7) Li, Y.; Lin, Z.; Huang, C.; Zhang, Y.; Wang, Z.; Tang, Y.; Chen, T.; Zhao, X.  
605 Metabolic Engineering of *Escherichia coli* Using CRISPR–Cas9 Meditated  
606 Genome Editing. *Metab. Eng.* **2015**, *31*, 13–21.  
607 <https://doi.org/10.1016/j.ymben.2015.06.006>.
- 608 (8) Roointan, A.; Morowvat, M. H. Road to the Future of Systems Biotechnology:  
609 CRISPR-Cas-Mediated Metabolic Engineering for Recombinant Protein  
610 Production. *Biotechnol. Genet. Eng. Rev.* **2016**, *32* (1–2), 74–91.  
611 <https://doi.org/10.1080/02648725.2016.1270095>.
- 612 (9) Bikard, D.; Jiang, W.; Samai, P.; Hochschild, A.; Zhang, F.; Marraffini, L. A.  
613 Programmable Repression and Activation of Bacterial Gene Expression Using  
614 an Engineered CRISPR-Cas System. *Nucleic Acids Res.* **2013**, *41* (15), 7429–  
615 7437. <https://doi.org/10.1093/nar/gkt520>.
- 616 (10) Depardieu, F.; Bikard, D. Gene Silencing with CRISPRi in Bacteria and  
617 Optimization of dCas9 Expression Levels. *Methods* **2020**, *172*, 61–75.  
618 <https://doi.org/10.1016/j.ymeth.2019.07.024>.
- 619 (11) Hogan, A. M.; Rahman, A. S. M. Z.; Lightly, T. J.; Cardona, S. T. A Broad-Host-  
620 Range CRISPRi Toolkit for Silencing Gene Expression in *Burkholderia*. *ACS*  
621 *Synth. Biol.* **2019**, *8* (10), 2372–2384.  
622 <https://doi.org/10.1021/acssynbio.9b00232>.
- 623 (12) Gilbert, L. A.; Horlbeck, M. A.; Adamson, B.; Villalta, J. E.; Chen, Y.; Whitehead,  
624 E. H.; Guimaraes, C.; Panning, B.; Ploegh, H. L.; Bassik, M. C.; Qi, L. S.;  
625 Kampmann, M.; Weissman, J. S. Genome-Scale CRISPR-Mediated Control of  
626 Gene Repression and Activation. *Cell* **2014**, *159* (3), 647–661.  
627 <https://doi.org/10.1016/j.cell.2014.09.029>.
- 628 (13) Gilbert, L. A.; Larson, M. H.; Morsut, L.; Liu, Z.; Brar, G. A.; Torres, S. E.; Stern-  
629 Ginossar, N.; Brandman, O.; Whitehead, E. H.; Doudna, J. A.; Lim, W. A.;  
630 Weissman, J. S.; Qi, L. S. CRISPR-Mediated Modular RNA-Guided Regulation

- 631 of Transcription in Eukaryotes. *Cell* **2013**, *154* (2), 442–451.  
632 <https://doi.org/10.1016/j.cell.2013.06.044>.
- 633 (14) Yeo, N. C.; Chavez, A.; Lance-Byrne, A.; Chan, Y.; Menn, D.; Milanova, D.; Kuo,  
634 C.-C.; Guo, X.; Sharma, S.; Tung, A.; Cecchi, R. J.; Tuttle, M.; Pradhan, S.; Lim,  
635 E. T.; Davidsohn, N.; Ebrahimkhani, M. R.; Collins, J. J.; Lewis, N. E.; Kiani, S.;  
636 Church, G. M. An Enhanced CRISPR Repressor for Targeted Mammalian Gene  
637 Regulation. *Nat. Methods* **2018**, *15* (8), 611–616.  
638 <https://doi.org/10.1038/s41592-018-0048-5>.
- 639 (15) Tanenbaum, M. E.; Gilbert, L. A.; Qi, L. S.; Weissman, J. S.; Vale, R. D. A  
640 Protein-Tagging System for Signal Amplification in Gene Expression and  
641 Fluorescence Imaging. *Cell* **2014**, *159* (3), 635–646.  
642 <https://doi.org/10.1016/j.cell.2014.09.039>.
- 643 (16) Perez-Pinera, P.; Kocak, D. D.; Vockley, C. M.; Adler, A. F.; Kabadi, A. M.;  
644 Polstein, L. R.; Thakore, P. I.; Glass, K. A.; Ousterout, D. G.; Leong, K. W.;  
645 Guilak, F.; Crawford, G. E.; Reddy, T. E.; Gersbach, C. A. RNA-Guided Gene  
646 Activation by CRISPR-Cas9–Based Transcription Factors. *Nat. Methods* **2013**,  
647 *10* (10), 973–976. <https://doi.org/10.1038/nmeth.2600>.
- 648 (17) Dominguez, A. A.; Lim, W. A.; Qi, L. S. Beyond Editing: Repurposing CRISPR–  
649 Cas9 for Precision Genome Regulation and Interrogation. *Nat. Rev. Mol. Cell*  
650 *Biol.* **2016**, *17* (1), 5–15. <https://doi.org/10.1038/nrm.2015.2>.
- 651 (18) Dove, S. L.; Hochschild, A. A Bacterial Two-Hybrid System Based on  
652 Transcription Activation. In *Protein-Protein Interactions*; Humana Press: New  
653 Jersey, 2004; Vol. 261, pp 231–246. <https://doi.org/10.1385/1-59259-762-9:231>.
- 654 (19) Dove, S. L.; Joung, J. K.; Hochschild, A. Activation of Prokaryotic Transcription  
655 through Arbitrary Protein–Protein Contacts. *Nature* **1997**, *386* (6625), 627–630.  
656 <https://doi.org/10.1038/386627a0>.
- 657 (20) Gregory, B. D.; Deighan, P.; Hochschild, A. An Artificial Activator That Contacts  
658 a Normally Occluded Surface of the RNA Polymerase Holoenzyme. *J. Mol. Biol.*  
659 **2005**, *353* (3), 497–506. <https://doi.org/10.1016/j.jmb.2005.08.047>.
- 660 (21) Ho, H.; Fang, J. R.; Cheung, J.; Wang, H. H. Programmable CRISPR-Cas  
661 Transcriptional Activation in Bacteria. *Mol. Syst. Biol.* **2020**, *16* (7).  
662 <https://doi.org/10.15252/msb.20199427>.
- 663 (22) Dong, C.; Fontana, J.; Patel, A.; Carothers, J. M.; Zalatan, J. G. Synthetic  
664 CRISPR-Cas Gene Activators for Transcriptional Reprogramming in Bacteria.  
665 *Nat. Commun.* **2018**, *9* (1). <https://doi.org/10.1038/s41467-018-04901-6>.
- 666 (23) Liu, Y.; Wan, X.; Wang, B. Engineered CRISPRa Enables Programmable  
667 Eukaryote-like Gene Activation in Bacteria. *Nat. Commun.* **2019**, *10* (1).  
668 <https://doi.org/10.1038/s41467-019-11479-0>.
- 669 (24) Yan, Q.; Xu, K.; Xing, J.; Zhang, T.; Wang, X.; Wei, Z.; Ren, C.; Liu, Z.; Shao,  
670 S.; Zhang, Z. Multiplex CRISPR/Cas9-Based Genome Engineering Enhanced by  
671 Drosha-Mediated SgRNA-ShRNA Structure. *Sci. Rep.* **2016**, *6* (1).  
672 <https://doi.org/10.1038/srep38970>.
- 673 (25) Haurwitz, R. E.; Jinek, M.; Wiedenheft, B.; Zhou, K.; Doudna, J. A. Sequence-  
674 and Structure-Specific RNA Processing by a CRISPR Endonuclease. *Science*  
675 **2010**, *329* (5997), 1355–1358. <https://doi.org/10.1126/science.1192272>.
- 676 (26) Nissim, L.; Perli, S. D.; Fridkin, A.; Perez-Pinera, P.; Lu, T. K. Multiplexed and  
677 Programmable Regulation of Gene Networks with an Integrated RNA and  
678 CRISPR/Cas Toolkit in Human Cells. *Mol. Cell* **2014**, *54* (4), 698–710.  
679 <https://doi.org/10.1016/j.molcel.2014.04.022>.

- 680 (27) Gao, Y.; Zhao, Y. Self-processing of Ribozyme-flanked RNAs into Guide RNAs  
681 *in Vitro* and *in Vivo* for CRISPR-mediated Genome Editing. *J. Integr. Plant Biol.*  
682 **2014**, *56* (4), 343–349. <https://doi.org/10.1111/jipb.12152>.
- 683 (28) Xie, K.; Minkenberg, B.; Yang, Y. Boosting CRISPR/Cas9 Multiplex Editing  
684 Capability with the Endogenous TRNA-Processing System. *Proc. Natl. Acad.*  
685 *Sci.* **2015**, *112* (11), 3570–3575. <https://doi.org/10.1073/pnas.1420294112>.
- 686 (29) Zetsche, B.; Heidenreich, M.; Mohanraju, P.; Fedorova, I.; Kneppers, J.;  
687 DeGennaro, E. M.; Winblad, N.; Choudhury, S. R.; Abudayyeh, O. O.;  
688 Gootenberg, J. S.; Wu, W. Y.; Scott, D. A.; Severinov, K.; van der Oost, J.;  
689 Zhang, F. Multiplex Gene Editing by CRISPR–Cpf1 Using a Single CrRNA Array.  
690 *Nat. Biotechnol.* **2016**, *35*, 31.
- 691 (30) Fonfara, I.; Richter, H.; Bratovič, M.; Le Rhun, A.; Charpentier, E. The CRISPR-  
692 Associated DNA-Cleaving Enzyme Cpf1 Also Processes Precursor CRISPR  
693 RNA. *Nature* **2016**, *532* (7600), 517–521. <https://doi.org/10.1038/nature17945>.
- 694 (31) Dong, D.; Ren, K.; Qiu, X.; Zheng, J.; Guo, M.; Guan, X.; Liu, H.; Li, N.; Zhang,  
695 B.; Yang, D.; Ma, C.; Wang, S.; Wu, D.; Ma, Y.; Fan, S.; Wang, J.; Gao, N.;  
696 Huang, Z. The Crystal Structure of Cpf1 in Complex with CRISPR RNA. *Nature*  
697 **2016**, *532* (7600), 522–526. <https://doi.org/10.1038/nature17944>.
- 698 (32) Zetsche, B.; Gootenberg, J. S.; Abudayyeh, O. O.; Slaymaker, I. M.; Makarova,  
699 K. S.; Essletzbichler, P.; Volz, S. E.; Joung, J.; van der Oost, J.; Regev, A.;  
700 Koonin, E. V.; Zhang, F. Cpf1 Is a Single RNA-Guided Endonuclease of a Class  
701 2 CRISPR-Cas System. *Cell* **2015**, *163* (3), 759–771.  
702 <https://doi.org/10.1016/j.cell.2015.09.038>.
- 703 (33) Campa, C. C.; Weisbach, N. R.; Santinha, A. J.; Incarnato, D.; Platt, R. J.  
704 Multiplexed Genome Engineering by Cas12a and CRISPR Arrays Encoded on  
705 Single Transcripts. *Nat. Methods* **2019**, *16* (9), 887–893.  
706 <https://doi.org/10.1038/s41592-019-0508-6>.
- 707 (34) Kim, H. K.; Song, M.; Lee, J.; Menon, A. V.; Jung, S.; Kang, Y.-M.; Choi, J. W.;  
708 Woo, E.; Koh, H. C.; Nam, J.-W.; Kim, H. In Vivo High-Throughput Profiling of  
709 CRISPR–Cpf1 Activity. *Nat. Methods* **2017**, *14* (2), 153–159.  
710 <https://doi.org/10.1038/nmeth.4104>.
- 711 (35) Miao, C.; Zhao, H.; Qian, L.; Lou, C. Systematically Investigating the Key  
712 Features of the DNase Deactivated Cpf1 for Tunable Transcription Regulation in  
713 Prokaryotic Cells. *Synth. Syst. Biotechnol.* **2019**, *4* (1), 1–9.  
714 <https://doi.org/10.1016/j.synbio.2018.11.002>.
- 715 (36) Hu, J. H.; Miller, S. M.; Geurts, M. H.; Tang, W.; Chen, L.; Sun, N.; Zeina, C. M.;  
716 Gao, X.; Rees, H. A.; Lin, Z.; Liu, D. R. Evolved Cas9 Variants with Broad PAM  
717 Compatibility and High DNA Specificity. *Nature* **2018**, *556* (7699), 57–63.  
718 <https://doi.org/10.1038/nature26155>.
- 719 (37) Kleinstiver, B. P.; Sousa, A. A.; Walton, R. T.; Tak, Y. E.; Hsu, J. Y.; Clement,  
720 K.; Welch, M. M.; Horng, J. E.; Malagon-Lopez, J.; Scarfò, I.; Maus, M. V.;  
721 Pinello, L.; Aryee, M. J.; Joung, J. K. Engineered CRISPR–Cas12a Variants with  
722 Increased Activities and Improved Targeting Ranges for Gene, Epigenetic and  
723 Base Editing. *Nat. Biotechnol.* **2019**, *37* (3), 276–282.  
724 <https://doi.org/10.1038/s41587-018-0011-0>.
- 725 (38) Zhang, X.; Wang, J.; Cheng, Q.; Zheng, X.; Zhao, G.; Wang, J. Multiplex Gene  
726 Regulation by CRISPR–DdCpf1. *Cell Discov.* **2017**, *3* (1).  
727 <https://doi.org/10.1038/celldisc.2017.18>.
- 728 (39) Jeong, H.; Choi, S.-K.; Ryu, C.-M.; Park, S.-H. Chronicle of a Soil Bacterium:  
729 *Paenibacillus polymyxa* E681 as a Tiny Guardian of Plant and Human Health.  
730 *Front. Microbiol.* **2019**, *10*, 467. <https://doi.org/10.3389/fmicb.2019.00467>.

- 731 (40) Rütering, M.; Schmid, J.; Rühmann, B.; Schilling, M.; Sieber, V. Controlled  
732 Production of Polysaccharides—Exploiting Nutrient Supply for Levan and  
733 Heteropolysaccharide Formation in *Paenibacillus* sp. *Carbohydr. Polym.* **2016**,  
734 *148*, 326–334. <https://doi.org/10.1016/j.carbpol.2016.04.074>.
- 735 (41) Rütering, M.; Schmid, J.; Gansbiller, M.; Braun, A.; Kleinen, J.; Schilling, M.;  
736 Sieber, V. Rheological Characterization of the Exopolysaccharide Paenan in  
737 Surfactant Systems. *Carbohydr. Polym.* **2018**, *181*, 719–726.  
738 <https://doi.org/10.1016/j.carbpol.2017.11.086>.
- 739 (42) Rütering, M.; Cress, B. F.; Schilling, M.; Rühmann, B.; Koffas, M. A. G.; Sieber,  
740 V.; Schmid, J. Tailor-Made Exopolysaccharides—CRISPR-Cas9 Mediated  
741 Genome Editing in *Paenibacillus polymyxa*. *Synth. Biol.* **2017**, *2* (1).  
742 <https://doi.org/10.1093/synbio/ysx007>.
- 743 (43) Schmid, J. Recent Insights in Microbial Exopolysaccharide Biosynthesis and  
744 Engineering Strategies. *Curr. Opin. Biotechnol.* **2018**, *53*, 130–136.  
745 <https://doi.org/10.1016/j.copbio.2018.01.005>.
- 746 (44) Ji, X.-J.; Huang, H.; Ouyang, P.-K. Microbial 2,3-Butanediol Production: A State-  
747 of-the-Art Review. *Biotechnol. Adv.* **2011**, *29* (3), 351–364.  
748 <https://doi.org/10.1016/j.biotechadv.2011.01.007>.
- 749 (45) Schilling, C.; Ciccone, R.; Sieber, V.; Schmid, J. Engineering of the 2,3-  
750 Butanediol Pathway of *Paenibacillus polymyxa* DSM 365. *Metab. Eng.* **2020**, (in  
751 press).
- 752 (46) Gibson, D. G.; Young, L.; Chuang, R.-Y.; Venter, J. C.; Hutchison, C. A.; Smith,  
753 H. O. Enzymatic Assembly of DNA Molecules up to Several Hundred Kilobases.  
754 *Nat. Methods* **2009**, *6* (5), 343–345. <https://doi.org/10.1038/nmeth.1318>.
- 755 (47) Livak, K. J.; Schmittgen, T. D. Analysis of Relative Gene Expression Data Using  
756 Real-Time Quantitative PCR and the 2- $\Delta\Delta$ CT Method. *Methods* **2001**, *25* (4),  
757 402–408. <https://doi.org/10.1006/meth.2001.1262>.
- 758 (48) Rühmann, B.; Schmid, J.; Sieber, V. Fast Carbohydrate Analysis via Liquid  
759 Chromatography Coupled with Ultra Violet and Electrospray Ionization Ion Trap  
760 Detection in 96-Well Format. *J. Chromatogr. A* **2014**, *1350*, 44–50.  
761 <https://doi.org/10.1016/j.chroma.2014.05.014>.
- 762 (49) Novotny, R.; Berger, H.; Schinko, T.; Messner, P.; Schäffer, C.; Strauss, J. A  
763 Temperature-Sensitive Expression System Based on the *Geobacillus*  
764 *Stearothermophilus* NRS 2004/3a *SgsE* Surface-Layer Gene Promoter.  
765 *Biotechnol. Appl. Biochem.* **2008**, *49* (1), 35.  
766 <https://doi.org/10.1042/BA20070083>.
- 767 (50) Niu, W.; Kim, Y.; Tau, G.; Heyduk, T.; Ebright, R. H. Transcription Activation at  
768 Class II CAP-Dependent Promoters: Two Interactions between CAP and RNA  
769 Polymerase. *Cell* **1996**, *87* (6), 1123–1134. [https://doi.org/10.1016/S0092-8674\(00\)81806-1](https://doi.org/10.1016/S0092-8674(00)81806-1).
- 771 (51) Picossi, S.; Belitsky, B. R.; Sonenshein, A. L. Molecular Mechanism of the  
772 Regulation of *Bacillus Subtilis* *GltAB* Expression by *GltC*. *J. Mol. Biol.* **2007**, *365*  
773 (5), 1298–1313. <https://doi.org/10.1016/j.jmb.2006.10.100>.
- 774 (52) Dove, S. L.; Hochschild, A. Conversion of the Omega Subunit of *Escherichia coli*  
775 RNA Polymerase into a Transcriptional Activator or an Activation Target. *Genes*  
776 *Dev.* **1998**, *12* (5), 745–754. <https://doi.org/10.1101/gad.12.5.745>.
- 777 (53) Zafar, M. A.; Shah, I. M.; Wolf, R. E. Protein–Protein Interactions Between  $\Sigma$ 70  
778 Region 4 of RNA Polymerase and *Escherichia coli* *SoxS*, a Transcription  
779 Activator That Functions by the Prerecruitment Mechanism: Evidence for “Off-  
780 DNA” and “On-DNA” Interactions. *J. Mol. Biol.* **2010**, *401* (1), 13–32.  
781 <https://doi.org/10.1016/j.jmb.2010.05.052>.

- 782 (54) Shah, I. M.; Wolf, R. E. Novel Protein–Protein Interaction Between *Escherichia*  
783 *coli* SoxS and the DNA Binding Determinant of the RNA Polymerase  $\alpha$  Subunit:  
784 SoxS Functions as a Co-Sigma Factor and Redeploys RNA Polymerase from  
785 UP-Element-Containing Promoters to SoxS-Dependent Promoters during  
786 Oxidative Stress. *J. Mol. Biol.* **2004**, *343* (3), 513–532.  
787 <https://doi.org/10.1016/j.jmb.2004.08.057>.
- 788 (55) Umarov, R. Kh.; Solovyev, V. V. Recognition of Prokaryotic and Eukaryotic  
789 Promoters Using Convolutional Deep Learning Neural Networks. *PLOS ONE*  
790 **2017**, *12* (2), e0171410. <https://doi.org/10.1371/journal.pone.0171410>.  
791
