# Supplementary material for: A novel prokaryotic CRISPR-Cas12a based tool for programmable transcriptional activation and repression
Source: bioRxiv or medRxiv preprint supplement (doi:10.1101/2020.08.05.232744), 2020-10-22
Supplement: Supplementary file [file media-1.pdf]

**Table S 1: Bacterial strains used in this study**

| Bacterial Strains                                | Genotype                                                                                     | Reference              |
|--------------------------------------------------|----------------------------------------------------------------------------------------------|------------------------|
| <i>E. coli</i> S17-1                             | Conjugation strain; <i>recA pro hsdR</i> ; RP42Tc::Mu-Km::Tn7 integrated into the chromosome | ATCC 47055             |
| <i>P. polymyxa</i> DSM 365                       | wild type                                                                                    | DSMZ                   |
| <i>P. polymyxa</i> DSM 365 $\Delta$ <i>ldh1</i>  | DSM 365 $\Delta$ <i>ldh1</i>                                                                 | Schilling et al (2020) |
| <i>P. polymyxa</i> DSM 365 $\Delta$ <i>pepCQ</i> | DSM 365 $\Delta$ <i>pepC</i>                                                                 | This study             |
| <i>P. polymyxa</i> DSM 365 $\Delta$ <i>pepQ</i>  | DSM 365 $\Delta$ <i>pepQ</i>                                                                 | This study             |

In addition to the strains listed above, each plasmid listed in Table S 2 was used for the transformation of *E. coli* S17-1 as well as for the conjugational transformation of *P. polymyxa* DSM 365.

**Table S 2: Plasmids used in this study**

| Plasmids          | Description                                                                                                                             | Reference             |
|-------------------|-----------------------------------------------------------------------------------------------------------------------------------------|-----------------------|
| pCasPP            | <i>P. polymyxa</i> CRISPR-Cas9 genome editing plasmid                                                                                   | Rütering et al (2017) |
| pCasPPH_pegC      | <i>pegC</i> targeting knock out plasmid containing repair template                                                                      | This study            |
| pCasPPH_pegQ      | <i>pegQ</i> targeting knock out plasmid containing repair template                                                                      | This study            |
| pCRai             | <i>PsgsE-AsdCas12a</i> ; <i>Pgapdh</i> -off target gRNA; <i>neo</i> ; <i>oriT</i> , <i>repU</i>                                         | This study            |
| pCRaiGFP          | <i>PsgsE-AsdCas12a</i> ; <i>Pgapdh</i> -off target gRNA; <i>neo</i> ; <i>oriT</i> , <i>repU</i> ; <i>PsgsE-sfGFP</i>                    | This study            |
| pCRaiGmR_soxS     | <i>PsgsE-AsdCas12a-soxS</i> ; <i>Pgapdh</i> -off target gRNA; <i>neo</i> ; <i>oriT</i> , <i>repU</i> ; <i>PsgsE_mRFP-US-PsgsE-sfGFP</i> | This study            |
| pCRaiGFP_GltC     | Test plasmid for CRISPRa targeting US region of <i>PsgsE-sfGFP</i> - off target gRNA                                                    | This study            |
| pCRaiGFP_GltC_a1  | Test plasmid for CRISPRa targeting US region of <i>PsgsE-sfGFP</i> - sgRNA_a1                                                           | This study            |
| pCRaiGFP_GltC_a2  | Test plasmid for CRISPRa targeting US region of <i>PsgsE-sfGFP</i> - sgRNA_a2                                                           | This study            |
| pCRaiGFP_GltC_a3  | Test plasmid for CRISPRa targeting US region of <i>PsgsE-sfGFP</i> - sgRNA_a3                                                           | This study            |
| pCRaiGFP_GltC_a4  | Test plasmid for CRISPRa targeting US region of <i>PsgsE-sfGFP</i> - sgRNA_a4                                                           | This study            |
| pCRaiGFP_sig70    | Test plasmid for CRISPRa targeting US region of <i>PsgsE-sfGFP</i> - off target gRNA                                                    | This study            |
| pCRaiGFP_sig70_a1 | Test plasmid for CRISPRa targeting US region of <i>PsgsE-sfGFP</i> - sgRNA_a1                                                           | This study            |
| pCRaiGFP_sig70_a2 | Test plasmid for CRISPRa targeting US region of <i>PsgsE-sfGFP</i> - sgRNA_a2                                                           | This study            |
| pCRaiGFP_sig70_a3 | Test plasmid for CRISPRa targeting US region of <i>PsgsE-sfGFP</i> - sgRNA_a3                                                           | This study            |
| pCRaiGFP_sig70_a4 | Test plasmid for CRISPRa targeting US region of <i>PsgsE-sfGFP</i> - sgRNA_a4                                                           | This study            |
| pCRai_GFP_rpoD_a1 | Test plasmid for CRISPRa targeting US region of <i>PsgsE-</i>                                                                           | This study            |

|                                |                                                                                                                             |            |
|--------------------------------|-----------------------------------------------------------------------------------------------------------------------------|------------|
|                                | <i>sfGFP</i> - sgRNA_a1                                                                                                     |            |
| <b>pCRai_GFP_rpoD_a2</b>       | Test plasmid for CRISPRa targeting US region of PsgsE- <i>sfGFP</i> - sgRNA_a2                                              | This study |
| <b>pCRai_GFP_rpoD_a3</b>       | Test plasmid for CRISPRa targeting US region of PsgsE- <i>sfGFP</i> - sgRNA_a3                                              | This study |
| <b>pCRai_GFP_rpoD_a4</b>       | Test plasmid for CRISPRa targeting US region of PsgsE- <i>sfGFP</i> - sgRNA_a4                                              | This study |
| <b>pCRai_GFP_rpoD</b>          | Test plasmid for CRISPRa targeting US region of PsgsE- <i>sfGFP</i> - off target gRNA                                       | This study |
| <b>pCRai_GFP_soxS_a1</b>       | Test plasmid for CRISPRa targeting US region of PsgsE- <i>sfGFP</i> - sgRNA_a1                                              | This study |
| <b>pCRai_GFP_soxS_a2</b>       | Test plasmid for CRISPRa targeting US region of PsgsE- <i>sfGFP</i> - sgRNA_a2                                              | This study |
| <b>pCRai_GFP_soxS_a3</b>       | Test plasmid for CRISPRa targeting US region of PsgsE- <i>sfGFP</i> - sgRNA_a3                                              | This study |
| <b>pCRai_GFP_soxS_a4</b>       | Test plasmid for CRISPRa targeting US region of PsgsE- <i>sfGFP</i> - sgRNA_a4                                              | This study |
| <b>pCRai_GFP_soxS</b>          | Test plasmid for CRISPRa targeting US region of PsgsE- <i>sfGFP</i> - off target gRNA                                       | This study |
| <b>pCRai_GFP_CRP_a1</b>        | Test plasmid for CRISPRa targeting US region of PsgsE- <i>sfGFP</i> - sgRNA_a1                                              | This study |
| <b>pCRai_GFP_CRP_a2</b>        | Test plasmid for CRISPRa targeting US region of PsgsE- <i>sfGFP</i> - sgRNA_a2                                              | This study |
| <b>pCRai_GFP_CRP_a3</b>        | Test plasmid for CRISPRa targeting US region of PsgsE- <i>sfGFP</i> - sgRNA_a3                                              | This study |
| <b>pCRai_GFP_CRP_a4</b>        | Test plasmid for CRISPRa targeting US region of PsgsE- <i>sfGFP</i> - sgRNA_a4                                              | This study |
| <b>pCRai_GFP_CRP</b>           | Test plasmid for CRISPRa targeting US region of PsgsE- <i>sfGFP</i> - off target gRNA                                       | This study |
| <b>pCRaiGFP_soxS_sfGFP_T1</b>  | Test plasmid for <i>sfGFP</i> repression sgRNA_T1                                                                           | This study |
| <b>pCRaiGFP_soxS_sfGFP_T2</b>  | Test plasmid for <i>sfGFP</i> repression sgRNA_T2                                                                           | This study |
| <b>pCRaiGFP_soxS_sfGFP_T3</b>  | Test plasmid for <i>sfGFP</i> repression sgRNA_T3                                                                           | This study |
| <b>pCRai_pepQ_T1</b>           | Plasmid for repression of <i>pepQ</i> sgRNA T1                                                                              | This study |
| <b>pCRai_pepCQ_T1</b>          | Plasmid for dual repression of <i>pepQ</i> and <i>pepC</i>                                                                  | This study |
| <b>pCRai_soxS_ldhmultibdh1</b> | Multiplex knock-down of repression of <i>ldh2</i> , <i>ldh3</i> , <i>ldh4</i> and activation of <i>Pbdh</i> (sgRNA 1)       | This study |
| <b>pCRai_soxS_ldhmultibdh2</b> | Multiplex knock-down of repression of <i>ldh2</i> , <i>ldh3</i> , <i>ldh4</i> and activation of <i>Pbdh</i> (sgRNA 2)       | This study |
| <b>pCRai_soxS_ldhmultibdh3</b> | Multiplex knock-down of repression of <i>ldh2</i> , <i>ldh3</i> , <i>ldh4</i> and activation of <i>Pbdh</i> (sgRNA 3)       | This study |
| <b>pCRaiGmR_soxS_mT2</b>       | PsgsE-mRFP-US-PsgsE- <i>sfGFP</i> expression plasmid with gRNA for mRFP repression (sgRNA T2)                               | This study |
| <b>pCRaiGmR_soxS_dualT2</b>    | PsgsE-mRFP-US-PsgsE- <i>sfGFP</i> expression plasmid with gRNA for mRFP repression (sgRNA T2) and GFP activation (sgRNA a1) | This study |
| <b>pCRaiGmR_soxS_GFPa1</b>     | PsgsE-mRFP-US-PsgsE- <i>sfGFP</i> expression plasmid with gRNA and GFP activation (sgRNA a1)                                | This study |

**Table S 3: Oligonucleotides and primers used in this study.** Overhangs used for Golden Gate Assembly or Gibson isothermal assembly are depicted in lower case. Restriction sites are underlined.

| Name                | SEQUENCE 5'->3'                                               | Comment                                         |
|---------------------|---------------------------------------------------------------|-------------------------------------------------|
| soxS_fw             | ATGTT <u>GGTCTCA</u> ACGCTGATGTCCCATCAGAAAATTATTCAGGATC       | Cloning of activator domain                     |
| soxS_rev            | TAAAAG <u>GTCTCGT</u> ACCATTTACAGGCGGTGGCGATAATCG             | Cloning of activator domain                     |
| sig70_fw            | ATGTT <u>GGTCTCA</u> ACGCTGATGATAGAGGACACACCCATTCGGT          | Cloning of activator domain                     |
| sig70_rev           | TAAAAG <u>GTCTCGT</u> ACCATTTCATTGCCATTCTCCTCCTTCC            | Cloning of activator domain                     |
| cAMP_fw             | ATGTT <u>GGTCTCA</u> ACGCTGATGCATCCCTATTATCGTTATTAGAAAAA      | Cloning of activator domain                     |
| cAMP_rev            | TAAAAG <u>GTCTCGT</u> ACCATTTAATGCGGATCACTACGAGCAA            | Cloning of activator domain                     |
| GltC_fw             | ATGTT <u>GGTCTCA</u> ACGCTGGTGGAATTACGACAGTTACAATACTTCATGAA   | Cloning of activator domain                     |
| GltC_rev            | TAAAAG <u>GTCTCGT</u> ACCATTCACTGCCCTAAATCCGCTTTG             | Cloning of activator domain                     |
| RpoD_fw             | ATGTT <u>GGTCTCA</u> ACGCTGGTGCTGTATCCTTCCATTGATGAAATG        | Cloning of activator domain                     |
| RpoD_rev            | TAAAAG <u>GTCTCGT</u> ACCATTTATTCTTCTTCGCCGCTTTC AAGT         | Cloning of activator domain                     |
| As_CRISPR_fw        | GGGGATACGCTAATTTCTACTCTTGATAGATAAGTCTTCTCAGCCG                | Construction of pCRai                           |
| As_CRISPR_rev       | AAATCCAGATGGAGTATGTCTTCACCGGTGGAAAGCG                         | Construction of pCRai                           |
| AsCRISPR_vec_fw     | CACCGGTGAAGACATACTCCATCTGGATTGTTTCAGAACGC                     | Construction of pCRai                           |
| AsCRISPR_vec_rev    | GTAGAAATTAGCGTATCCCCTTCAGATACTCGCAC                           | Construction of pCRai                           |
| enAsCPF1_fw         | TTAGGCTTTTACTTAATGACACAGTTTGAAGGCTTTACGAATCTG                 | Construction of pCRai                           |
| enAsCPF1_rev        | CGTAGATCTGAATTCTTATTACCCGAGACCTACCCAATGCG                     | Construction of pCRai                           |
| enAsCPF1_Vector.fw  | GGTCTCGGGTAATAAGAATTCAGATCTACGCGTTCCCGC                       | Construction of pCRai                           |
| enAsCPF1_Vector.REV | TTCAAAGTGTGTCATTAAGTAAAAGCCTAAAATCCCC TTCGTT                  | Construction of pCRai                           |
| GFP_vecint_rev      | gcaacgcgcccttttacggTTCCTGGCCATATGACGATCCTCCTTACCTCTCATTG      | <i>sfGFP</i> plasmid cloning                    |
| GFP_vecint_fw       | gcccgcaaccggcgcacatcaagcccgcGACTAGCAATATGAAACACGGAAAAAATCAAGC | <i>sfGFP</i> plasmid cloning                    |
| sgsE-a1_fw          | agatTTTATCTCACATAATAGGGCT                                     | Test gRNA for activation of PsgsE- <i>sfGFP</i> |
| sgsE-a1_rev         | gagtAGCCCTATTATGTGagatAA                                      | Test gRNA for activation of PsgsE- <i>sfGFP</i> |
| sgsE-a2_fw          | agatAGTCTATATCAATCGGTAAC                                      | Test gRNA for activation of PsgsE- <i>sfGFP</i> |
| sgsE-a2_rev         | gagtGTTACCGATTGATATAGACT                                      | Test gRNA for activation of PsgsE- <i>sfGFP</i> |

|                       |                                                            |                                                                                                   |
|-----------------------|------------------------------------------------------------|---------------------------------------------------------------------------------------------------|
| <b>sgsE-a3_fw</b>     | agatATCCTCATATTTTCCTAGTA                                   | Test gRNA for activation of PsgsE- <i>sfGFP</i>                                                   |
| <b>sgsE-a3_rev</b>    | gagtTACTAGGAAAATATGAGGAT                                   | Test gRNA for activation of PsgsE- <i>sfGFP</i>                                                   |
| <b>sgsE-a4_fw</b>     | agatCATCGATGGCGACATTGATA                                   | Test gRNA for activation of PsgsE- <i>sfGFP</i>                                                   |
| <b>sgsE-a4_rev</b>    | gagtTATCAATGTGCGCCATCGATG                                  | Test gRNA for activation of PsgsE- <i>sfGFP</i>                                                   |
| <b>sfGFP1_T1_fw</b>   | agatCGTGC GTGGCGAGGGTGAAG                                  | Test gRNA for repression of PsgsE- <i>sfGFP</i>                                                   |
| <b>sfGFP1_T1_rev</b>  | gagtCTTCACCCTCGCCACGCACG                                   | Test gRNA for repression of PsgsE- <i>sfGFP</i>                                                   |
| <b>sfGFP_T2_fw</b>    | agatCCATTAGTTGCGTCACCTTC                                   | Test gRNA for repression of PsgsE- <i>sfGFP</i>                                                   |
| <b>sfGFP_T2_rev</b>   | gagtGAAGGTGACGCAACTAATGG                                   | Test gRNA for repression of PsgsE- <i>sfGFP</i>                                                   |
| <b>sfGFP_T3_fw</b>    | agatAGCTCAATGCGGTTTACCAG                                   | Test gRNA for repression of PsgsE- <i>sfGFP</i>                                                   |
| <b>sfGFP_T3_rev</b>   | gagtCTGGTAAACCGCATTGAGCT                                   | Test gRNA for repression of PsgsE- <i>sfGFP</i>                                                   |
| <b>mRFP_T_fw</b>      | agatAAAGTTCGTATGGAAGGTTC                                   | gRNA for repression of PsgsE- <i>mRFP</i>                                                         |
| <b>mRFP_T_rev</b>     | gagtGAACCTCCATACGAACTTT                                    | gRNA for repression of PsgsE- <i>mRFP</i>                                                         |
| <b>sfGFP_dual_fw</b>  | agatTTATCTCACATAATAGGGCTTAATTTCTACTC                       | Test gRNA for repression of PsgsE- <i>mRFP</i> and simultaneous activation of PsgsE- <i>sfGFP</i> |
| <b>sfGFP_dual_rev</b> | acaaGAGTAGAAATTAAGCCCTATTATGTGAGATAA                       | Test gRNA for repression of PsgsE- <i>mRFP</i> and simultaneous activation of PsgsE- <i>sfGFP</i> |
| <b>mRFP_dual_fw</b>   | ttgtAGATAAAGTTCGTATGGAAGGTTC                               | Test gRNA for repression of PsgsE- <i>mRFP</i> and simultaneous activation of PsgsE- <i>sfGFP</i> |
| <b>mRFP_dual_rev</b>  | gagtGAACCTCCATACGAACTTTATCT                                | Test gRNA for repression of PsgsE- <i>mRFP</i> and simultaneous activation of PsgsE- <i>sfGFP</i> |
| <b>GGA_sfGFP_fw</b>   | AATTGGTCTCAA <del>ACT</del> CAATATGAAACACGGAAAAAATCAAGCAG  | Cloning of PsgsE- <i>mRFP</i> -US-PsgsE- <i>sfGFP</i> expression cassette                         |
| <b>GGA_sfGFP_rev</b>  | AATTGGTCTCA <del>CT</del> ACTAGTATGACGATCCTCCTTACCTCTCATTG | Cloning of PsgsE- <i>mRFP</i> -US-PsgsE- <i>sfGFP</i> expression cassette                         |
| <b>GGA_mRFP_fw</b>    | AATTGGTCTCATCGACCTGCATACTAGCCTGTTACAGGCATATTCATATCAATGTC   | Cloning of PsgsE- <i>mRFP</i> -US-PsgsE- <i>sfGFP</i> expression cassette                         |
| <b>GGA_mRFP_rev</b>   | CTTTGGTCTCAAGTTAAGCACCGGTGgagtGACGAC                       | Cloning of PsgsE- <i>mRFP</i> -US-PsgsE- <i>sfGFP</i> expression cassette                         |

|                       |                                     |                                           |
|-----------------------|-------------------------------------|-------------------------------------------|
| <b>pepQ_T1_fw</b>     | agatCACCAGCAGTGCAGACAATC            | gRNA for repression of <i>pepQ</i>        |
| <b>pepQ_T1_rev</b>    | gagtGATTGTCTGCACTGCTGGTG            | gRNA for repression of <i>pepQ</i>        |
| <b>pepCQ_T1_fw</b>    | agatCCTGACATGACAGCCTCGCCTAATTTCTACT | gRNAs for dual repression of <i>pepCQ</i> |
| <b>pepCQ_T1_rev</b>   | caagAGTAGAAATTAGGCGAGGCTGTCATGTCAGG | gRNAs for dual repression of <i>pepCQ</i> |
| <b>pepCQ2_T1_fw</b>   | cttgTAGATCACCAGCAGTGCAGACAATC       | gRNAs for dual repression of <i>pepCQ</i> |
| <b>pepCQ_T1_rev</b>   | gagtGATTGTCTGCACTGCTGGTGATCTA       | gRNAs for dual repression of <i>pepCQ</i> |
| <b>bdh1_fw</b>        | cttgTAGATGACACTCATTCTGTGGTATA       | gRNA cloning for <i>Ppbdh</i> activation  |
| <b>bdh1_rev</b>       | gagtTATACCACAGAATGAGTGTCATCTA       | gRNA cloning for <i>Ppbdh</i> activation  |
| <b>bdh2_fw</b>        | cttgTAGATTTCTTGTCTTTGCTTCAATT       | gRNA cloning for <i>Ppbdh</i> activation  |
| <b>bdh2_rev</b>       | gagtAATTGAAGCAAAGACAAGAAATCTA       | gRNA cloning for <i>Ppbdh</i> activation  |
| <b>bdh3_fw</b>        | gagtGCTCGTTACTTTTATACAAA            | gRNA cloning for <i>Ppbdh</i> activation  |
| <b>bdh3_rev</b>       | gagtTTTGTATAAAAGTAACGAGCATCTA       | gRNA cloning for <i>Ppbdh</i> activation  |
| <b>sfGFP_qPCR_fw</b>  | CCCTATTCTGGTGGAAGTGGATGG            | qPCR primer                               |
| <b>sfGFP_qPCR_rev</b> | CAGTAGTACAGATGAACTTCAGCGTC          | qPCR primer                               |
| <b>gyrA_qPCR_fw</b>   | GAGATATGGCCGCTGCGATG                | qPCR primer                               |
| <b>gyrA_qPCR_rev</b>  | GCTCTCTCACCATCGTAGTTCGG             | qPCR primer                               |
| <b>mRFP_qPCR_fw</b>   | TACCTGAAACTGTCCTTCCCGG              | qPCR primer                               |
| <b>mRFP_qPCR_rev</b>  | GTAGATGAACTCACCGTCTTGCAAG           | qPCR primer                               |
| <b>ldh3_qPCR_fw</b>   | GAGTCATTGGATCA GA CGTTGC            | qPCR primer                               |
| <b>ldh3_qPCR_rev</b>  | AACTCGGAGTCACCGTGTCTCC              | qPCR primer                               |
| <b>ldh2_qPCR_fw</b>   | GATTATCGGGGTTGGACGCATTGG            | qPCR primer                               |
| <b>ldh2_qPCR_rev</b>  | CAAGGTTGTGAATGGAATGACTTCCTTG        | qPCR primer                               |
| <b>ldh4_qPCR_fw</b>   | GAATGAGCCGGACCTGGATGCG              | qPCR primer                               |
| <b>ldh4_qPCR_rev</b>  | CAATCCTCGACTGGATCGGTGTTTC           | qPCR primer                               |
| <b>bdh_qPCR_fw</b>    | AGATGCTCAGCATCCATTGACTGG            | qPCR primer                               |
| <b>bdh_qPCR_rev</b>   | CAACGACACGGTCGCCAACCTG              | qPCR primer                               |

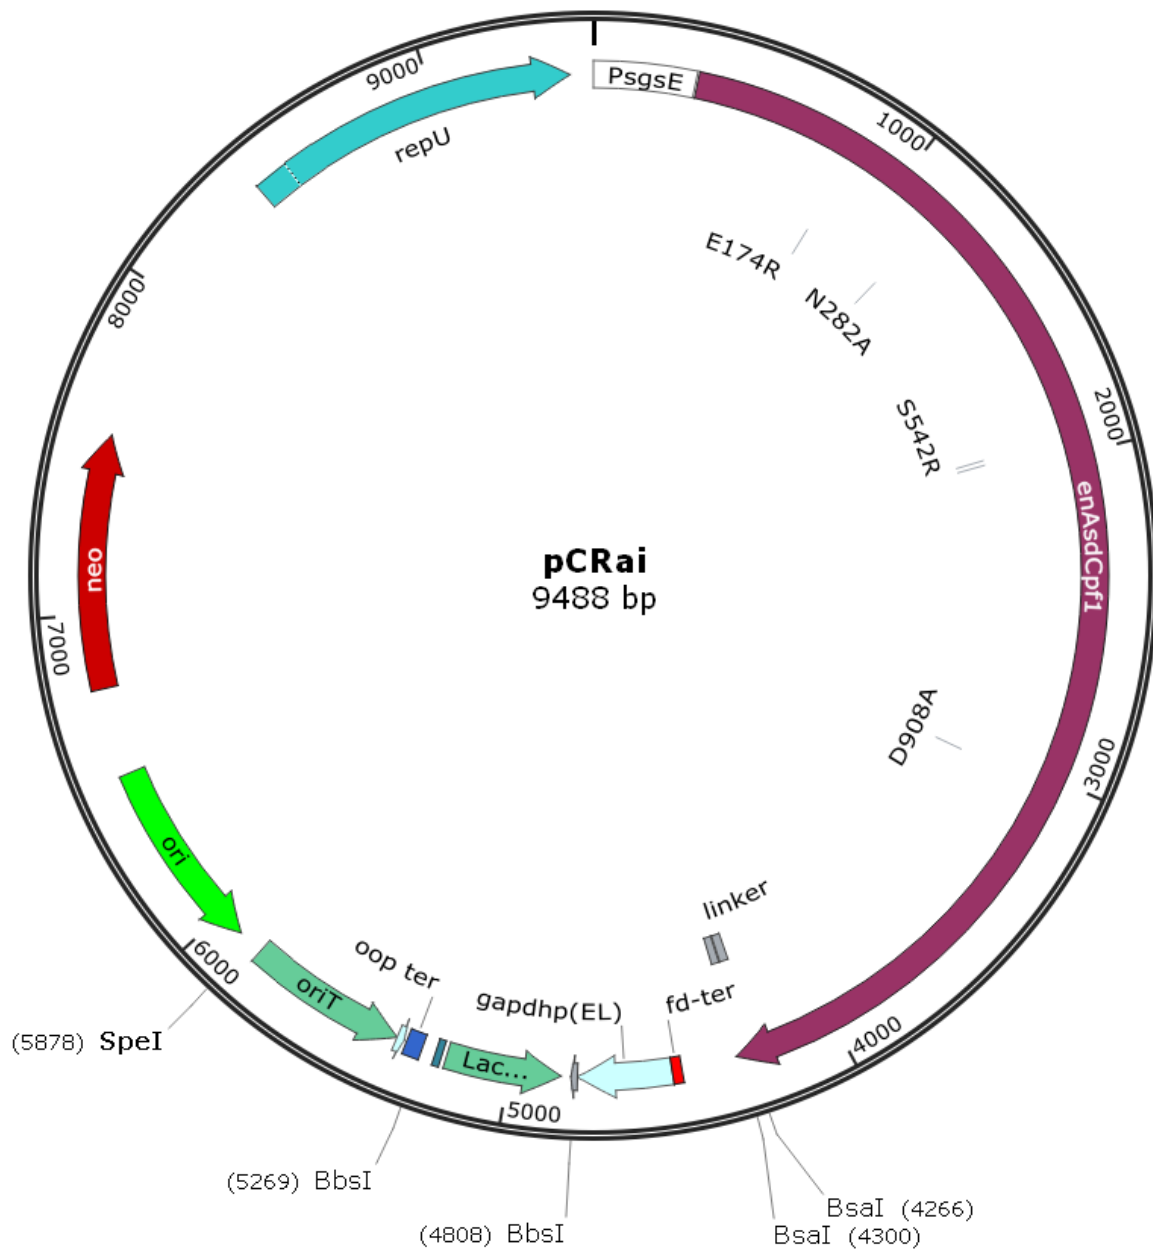

**Figure S 1: Plasmid map of pCRai.** The conjugational plasmid based on the pUB110 and pCasPP<sup>2</sup> plasmids was constructed via Gibson Assembly by replacing the Cas9-gRNA expression cassette with an engineered catalytically inactive variant of Cas12a<sup>3</sup> (E174R, N282A, S542R, K548R, D908A) and an appropriate CRISPR-array. Variable activator domains can be cloned by replacing a BsaI-cassette linked via a 10 aa flexible linker. The gRNAs can be cloned by Golden Gate Assembly using BbsI by replacing the *lacZ* expression cassette.

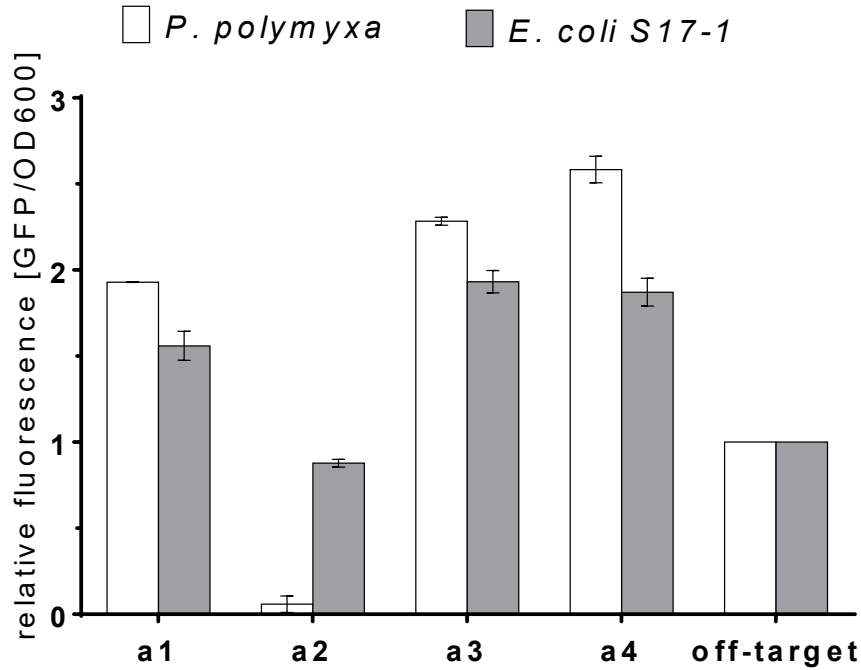

**Figure S 2: Relative fluorescence levels of *P. polymyxa* and *E. coli* S17-1 harboring pCRaiGFP\_soxS variants.** Four different gRNAs (a1-a4) were expressed and normalized fluorescence levels (Ex. 488 nm Em. 515 nm) were compared to a strain expressing an off-target gRNA. The gRNAs a1, a3 and a4 showed increased GFP fluorescence in *P. polymyxa* as well as *E. coli* S17-1 demonstrating similar effects in both, Gram-positive and Gram-negative host organisms.

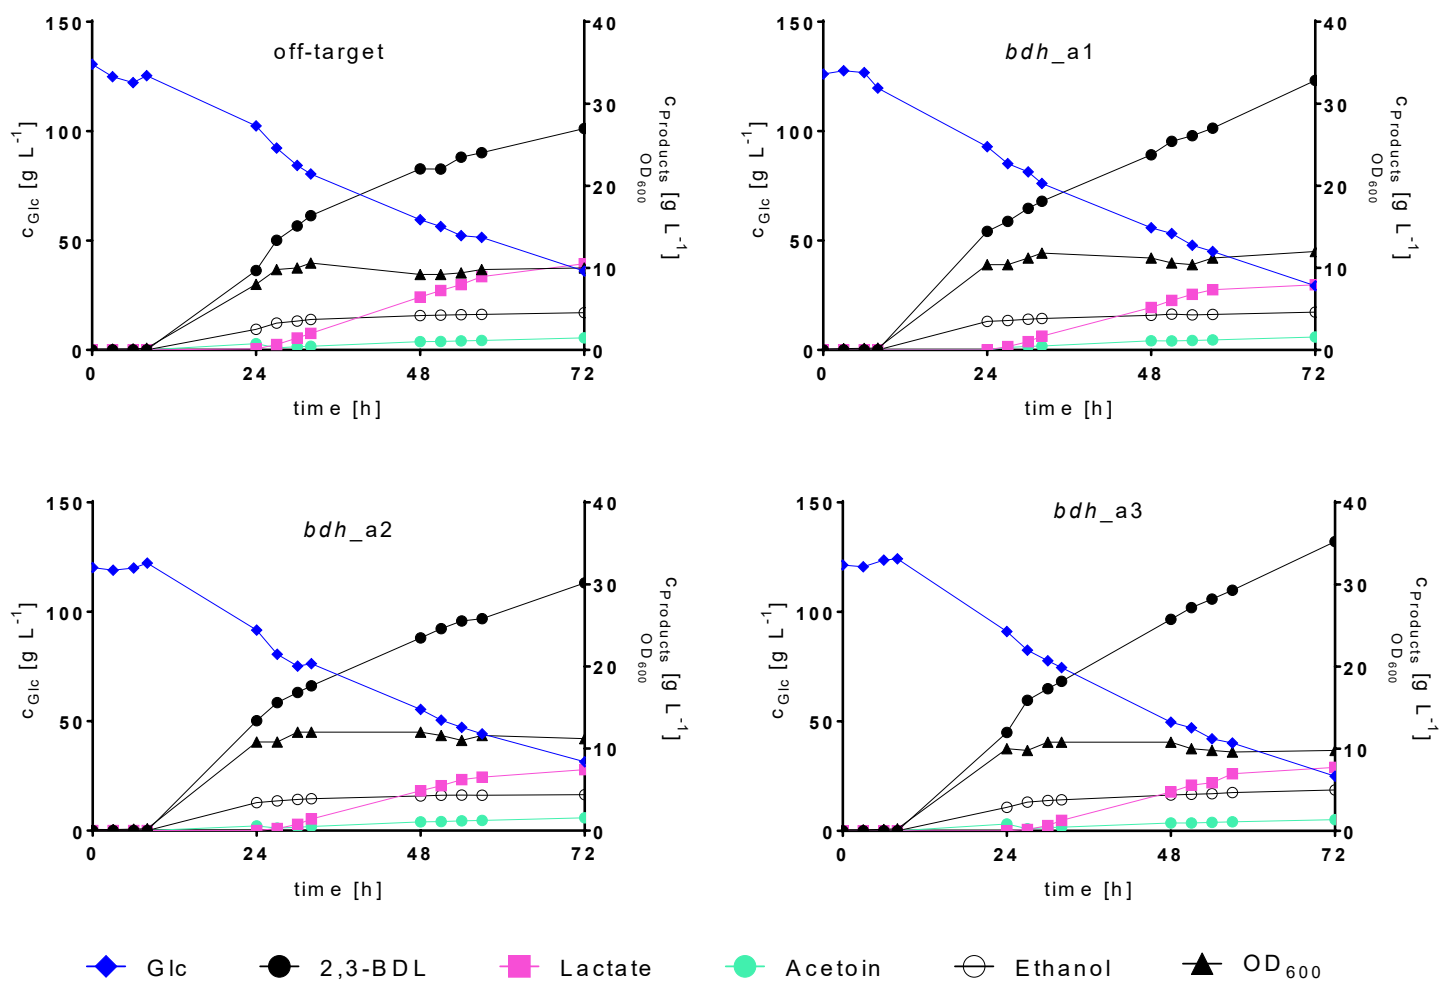

**Figure S 3: Profiles of 2,3-BDL fermentations.** Overview of fermentation profiles of single batch fermentations. *P. polymyxa* DSM 365 was transformed with pCRai\_soxS encoding either off-target gRNAs or a multiplex CRISPR-array targeting the open reading frame of three lactate dehydrogenases and the upstream region of  $P_{bdh}$  with three gRNAs (*bdh\_a1-a3*) individually. Lactate production was reduced by ~ 20 % in all variants expressing the corresponding gRNAs. Glc: Glucose; 2,3-BDL: 2,3-*R,R*-butantediol



**Table S 4 Final product titers and 2,3-BDL yield ( $\text{g}_{\text{BDL}} \text{g}_{\text{Glc}}^{-1}$ ) of 2,3-BDL fermentations.** *P. polymyxa* DSM 365 was transformed with pCRai\_soxS encoding either off-target gRNAs or a multiplex CRISPR-array targeting the open reading frame of three lactate dehydrogenases and the upstream region of  $P_{\text{bdh}}$  with three gRNAs (*bdh\_a1-a3*) individually. Values represent mean and deviation of biological duplicates after 72 h cultivation at microaerobic conditions.

|                      | <b>2,3-BDL</b> | <b>Ethanol</b> | <b>Acetoin</b> | <b>Lactate</b> | <b>Formate</b> | <b>Y<sub>PS</sub></b> |
|----------------------|----------------|----------------|----------------|----------------|----------------|-----------------------|
| <b>off-target</b>    | 27.46 ± 0.47   | 4.21 ± 0.33    | 1.34 ± 0.14    | 10.30 ± 0.20   | 0.34 ± 0.34    | 0.29 ± 0.01           |
| <b><i>bdh_a1</i></b> | 34.30 ± 1.45   | 4.84 ± 0.23    | 1.50 ± 0.08    | 7.69 ± 0.26    | 0.72 ± 0.03    | 0.34 ± 0.00           |
| <b><i>bdh_a2</i></b> | 32.44 ± 2.26   | 4.64 ± 0.25    | 1.42 ± 0.15    | 7.74 ± 0.30    | 0.72 ± 0.04    | 0.34 ± 0.00           |
| <b><i>bdh_a3</i></b> | 34.74 ± 0.50   | 4.89 ± 0.10    | 1.22 ± 0.08    | 7.81 ± 0.08    | 0.67 ± 0.07    | 0.35 ± 0.02           |

## References

- (1) Schilling, C.; Ciccone, R.; Sieber, V.; Schmid, J. Engineering of the 2,3-Butanediol Pathway of *Paenibacillus polymyxa* DSM 365. *Metab. Eng.* **2020**, (in press).
- (2) Rütering, M.; Cress, B. F.; Schilling, M.; Rühmann, B.; Koffas, M. A. G.; Sieber, V.; Schmid, J. Tailor-Made Exopolysaccharides—CRISPR-Cas9 Mediated Genome Editing in *Paenibacillus polymyxa*. *Synth. Biol.* **2017**, 2 (1). <https://doi.org/10.1093/synbio/ysx007>.
- (3) Kleinstiver, B. P.; Sousa, A. A.; Walton, R. T.; Tak, Y. E.; Hsu, J. Y.; Clement, K.; Welch, M. M.; Horng, J. E.; Malagon-Lopez, J.; Scarfò, I.; Maus, M. V.; Pinello, L.; Aryee, M. J.; Joung, J. K. Engineered CRISPR–Cas12a Variants with Increased Activities and Improved Targeting Ranges for Gene, Epigenetic and Base Editing. *Nat. Biotechnol.* **2019**, 37 (3), 276–282. <https://doi.org/10.1038/s41587-018-0011-0>.
